1 ***Nascent mutant Huntingtin exon 1 chains do not stall on ribosomes during translation but***  
2 ***aggregates do recruit machinery involved in ribosome quality control.***

3 Angelique R. Ormsby<sup>1</sup>, Dezeræe Cox<sup>1</sup>, James Daly<sup>1</sup>, David Priest<sup>1</sup>, Elizabeth Hinde<sup>1</sup>, and Danny M.  
4 Hatters<sup>1\*</sup>

5 <sup>1</sup>Department of Biochemistry and Molecular Biology; and Bio21 Molecular Science and Biotechnology  
6 Institute, The University of Melbourne, VIC 3010. Australia

7 \*Corresponding author. Ph: +61 38344 2530.

8 ***Abstract***

9 Mutations that cause Huntington's Disease involve a polyglutamine (polyQ) sequence expansion beyond  
10 35 repeats in exon 1 of Huntingtin. Intracellular inclusion bodies of mutant Huntingtin protein are a key  
11 feature of Huntington's disease brain pathology. We previously showed that in cell culture the  
12 formation of inclusions involved the assembly of disordered structures of mHtt exon 1 fragments  
13 (Httex1) and they were enriched with translational machinery when first formed. We hypothesized that  
14 nascent mutant Httex1 chains co-aggregate during translation by phase separation into liquid-like  
15 disordered aggregates and then convert to more rigid, amyloid structures. Here we further examined  
16 the mechanisms of inclusion assembly in a human epithelial kidney (AD293) cell culture model and  
17 examined whether ribosome quality control machinery previously implicated in stalled ribosomes were  
18 involved. We found mHttex1 did not appear to stall translation of its own nascent chain and there was  
19 no recruitment of RNA into inclusions. However, proteins involved in translation or ribosome quality  
20 control were co-recruited into the inclusions (Ltn1 and Rack1) compared to a protein not anticipated to  
21 be involved (NACAD). Furthermore, we observed co-aggregation with other proteins previously  
22 identified in inclusions, including Upf-1 and chaperone-like proteins Sgta and Hspb1, which also  
23 suppressed aggregation at high co-expression levels. The newly formed inclusions contained immobile

24 mHttex1 molecules which points to the disordered aggregates being mechanically rigid prior to amyloid  
25 formation.

26 **Keywords**

27 Huntington's Disease, flow cytometry, ribosome quality control, translation.

28

29 **INTRODUCTION**

30 Huntington Disease (HD) is an incurable and fatal neurodegenerative condition caused by dominant  
31 trinucleotide expansion mutations in exon 1 of the *Huntingtin* gene [1]. These mutations expand a  
32 polyglutamine (polyQ) sequence in the Huntingtin (Htt) protein to beyond a disease threshold of 35Q,  
33 which makes the protein become aggregation prone [2]. N-terminal mutant Htt fragments accumulate in  
34 intracellular inclusion bodies (inclusions) during disease progression, which represent a major hallmark  
35 of disease pathology [2-4].

36 The transgenic expression of the Htt exon 1 fragment (Httex1) in polyQ-expanded form is sufficient to  
37 produce a HD-like pathology in rodent and primate models, which is suggestive of these fragments  
38 mediating proteotoxicity [5-7]. The mechanism of toxicity remains to be unequivocally determined but it  
39 is thought to involve two distinct components; soluble and inclusion states of Httex1 [8]. Soluble states,  
40 which may include monomeric or small nanometer-sized oligomers of mutant Httex1 cause oxidative  
41 and mitochondrial stress and increase the risk of apoptosis in cell culture models of disease [9-12]. We  
42 previously suggested that the toxicity of the soluble forms of mutant Httex1 may involve a quality  
43 control feedback mechanism during translation involving stalled Httex1 nascent chains, which when  
44 unresolved triggers apoptosis [8]. Once inclusions form survival times are improved in cell culture  
45 models of disease, leading to a hypothesis that inclusion formation alleviates toxicity by sequestering  
46 the soluble toxic forms away from harm (reviewed in [13]). However, rather than returning the cell to a

47 normal state of homeostasis, cells in culture with inclusions are metabolically quiescent and die at a  
48 delayed rate by a non-apoptotic necrotic mechanism [8]. This finding suggests a second level of toxicity  
49 from the inclusions distinct to that from the soluble states.

50 Here we sought to further investigate the molecular processes governing inclusion assembly in the  
51 context of the hypothesis that newly synthesized mutant Httex1 stalls at the ribosome, attracts  
52 ribosome quality control machinery to resolve the stress and when unresolved triggers the nucleation of  
53 initially disordered aggregates into liquid-like droplets that then over time convert to amyloid. Since our  
54 initial prediction that mutant Httex1 aggregates may arise through phase separation into liquid-like  
55 structures, two studies have since reported evidence supporting this mechanisms of action [14, 15]. Our  
56 findings suggest that nascent Httex1 does not stall on ribosomes during translation but there is an  
57 enrichment of machinery involved in ribosome associated quality control into the inclusions. In our  
58 hands and model, however, we found the early formed inclusions comprised immobile mutant Httex1  
59 molecules with no evidence of liquid-like properties.

## 60 **METHODS**

61 **DNA vectors and constructs.** Human Httex1 and TC9-tagged Httex1 as fusions to fluorescent proteins  
62 were expressed in pT-Rex vectors with CMV-promoters as described previously [8]. The pFN21A-HaloTag  
63 constructs were purchased from Promega. The P2A stall construct was prepared as described previously  
64 including the Httex1 constructs [16]. The tandem P2A T2A constructs were made using T2A sequences  
65 from [17]. In essence the T2A sequence 5'  
66 GGCGAGGGCAGGGGAAGTCTTCTAACATGCGGGGACGTGGAGGAAAATCCCGGCCCA was inserted after the  
67 P2A sequence of the existing Httex1(25Q) sequence in the pTriEx4 vector (GeneArt). The sequence of  
68 the derived vector is shown in **Table 1**. From this, the Httex1(97Q) and 20K variants were made by  
69 excising the gene fragments from the original stall reporter via NotI and BamHI restriction sites. The  
70 control linker was made by PCR amplification using forward (5'

71 GCGGCCGCTATGCCTGGACCTACACCTAGCG) and reverse (5' GGATCCGCCGGTTTTTCAGGCCAGGGC)  
72 primers and ligation into the P2A T2A Htt25Q Stall Reporter via the NotI and BamHI restriction sites.

73

74 **Table 1. Sequence of the base stall construct \***

|                                                                                                         |
|---------------------------------------------------------------------------------------------------------|
| *Sequences are highlighted as follows. GFP; P2A; T2A; Httex1(25Q); mCherry                              |
| CCATGGTGAGCAAGGGCGAGGAGCTGTTACCGGGGTGGTGCCATCCTGGTCGAGCTGGACGGCGACGTAAACGGCCA                           |
| CAAGTTCAGCGTGTCCGGCGAGGGCGAGGGCGATGCCACCTACGGCAAGCTGACCTGAAGTTCATCTGCACCACGGCA                          |
| AGCTGCCCGTGCCCTGGCCACCTCGTGACCACCTGACCTACGGCGTGCAGTGCTTCAGCCGCTACCCGACCACATGAA                          |
| GCAGCAGACTTCTCAAGTCCGCCATGCCGAAGGCTACGTCCAGGAGCGCACCATCTTCTCAAGGACGACGGCAACTA                           |
| CAAGACCCGCGCCGAGGTGAAGTTCGAGGGCGACACCCTGGTGAACCGCATCGAGCTGAAGGGCATCGACTCAAGGAG                          |
| GACGGCAACATCCTGGGGCACAAGCTGGAGTACAACACAGCCACAACGTCTATATCATGGCCGACAAGCAGAAGAA                            |
| CGGCATCAAGGTGAACTTCAAGATCCGCCACAACATCGAGGACGGCAGCGTGCAGCTCGCCGACCACTACCAGCAGAACA                        |
| CCCCATCGGGCGACGGCCCCGTGCTGCTGCCGACAACCACTACCTGAGCACCCAGTCCGCCCTGAGCAAAGACCCCAACG                        |
| AGAAGCGCGATCACATGGTCTGCTGGAGTTCGTGACCGCCGCCGGGATCACTCTCGGCATGGACGAGCTGTACAAGGCT                         |
| AGCGGAAGCGGAGCTACTAACTTCAGCCTGCTGAAGCAGGCTGGAGACGTGGAGGAGAACCCTGGACCTCTGCAGGGCT                         |
| CCGGCGAGGGCAGGGGAAGTCTTCTAACATGCGGGGACGTGGAGGAAAATCCCGGCCAAGCAGGGGCGGCCGCCCTT                           |
| CACAatggcgaccctggaaaagctgatgaaggcctcgagtcctcaaagcttcaacagcagcaacagcaacaacagcagcaacagcaacaacagcagc       |
| aacagcaacaacagcagcaacagcaacaaccgccaccacctccccctccacccccacctcctcaactcctcaactcctccacaggcacagcctctgctgcctc |
| agccacaacctcctccacctccacctcctccagcccagctgtggctgaggagcctctgcaccgacctgGATCCGGTACC                         |
| ACTAACTTCAGCCTGCTGAAGCAGGCTGGAGACGTGGAGGAGAACCCTGGACCTACCGGTGGCTCCGGCGAGGGCAGGG                         |
| GAAGTCTTCTAACATGCGGGGACGTGGAGGAAAATCCCGGCCAAGATTCTGTGAGCAAGGGCGAGGAGGATAACATGGC                         |
| CATCATCAAGGAGTTCATGCGCTTCAAGGTGCACATGGAGGGCTCCGTGAACGGCCACGAGTTCGAGATCGAGGGGCGAGG                       |
| GCGAGGGCCGCCCTACGAGGGCACCCAGACCGCCAAGCTGAAGGTGACCAAGGGTGGCCCCCTGCCCTTCGCTGGGAC                          |
| ATCCTGTCCCCTCAGTTCATGTACGGCTCCAAGGCCTACGTGAAGCACCCCGCCGACATCCCCGACTACTTGAAGCTGTCTT                      |

```
TCCCCGAGGGCTTCAAGTGGGAGCGCGTGATGAACTTCGAGGACGGCGGGCGTGGTGACCGTGACCCAGGACTCCTCCCTA
CAGGACGGCGAGTTCATCTACAAGGTGAAGCTGCGCGGCACCAACTTCCCCTCCGACGGCCCCGTAATGCAGAAGAAGAC
TATGGGCTGGGAGGCCTCCTCCGAGCGGATGTACCCCGAGGACGGCGCCCTGAAGGGCGAGATCAAGCAGAGGCTGAAG
CTGAAGGACGGCGGCCACTACGACGCTGAGGTCAAGACCACCTACAAGGCCAAGAAGCCCCTGCAGCTGCCCGGCGCCTA
CAACGTCAACATCAAGTTGGACATCACCTCCACAACGAGGACTACACCATCGTGGAACAGTACGAACGCGCCGAGGGCC
GCCACTCCACCGGCGGCATGGACGAGCTGTACAAGTAACTCGAG
```

75

76 **Cell culture.** All experiments were performed with the HEK293 cell line derivative AD293, which was  
77 maintained in DMEM supplemented with 10 % (w/v) fetal calf serum (FCS) and 1 mM glutamine in a  
78 37°C humidified incubator with 5% v/v atmospheric CO<sub>2</sub>. For microscopy experiments cells were plated  
79 at  $3 \times 10^4$  cells per well in an 8-well  $\mu$ -slide (Ibidi). For flow cytometry experiments cells were plated at  
80  $0.5 \times 10^5$  cells in a 24-well plate. Cells were transiently transfected with the vectors using Lipofectamine  
81 3000 reagent as per manufacturer's instructions (Life Technologies), and media was changed 6 hours  
82 post transfection. For the HaloTag experiments, the transfection was done in a way so as to decouple  
83 the correlated expression of the two plasmids. Specifically, this was achieved by mixing the plasmids  
84 separately with Lipofectamine, before combining the lipofectamine:DNA complexes together to add to  
85 the cells.

86 **Western Blot.** AD293 cells were transfected with P2A or P2A T2A stall constructs and harvested 24  
87 hours post transfection. Cells were pelleted (200 *g*, 6 mins) and resuspended in RIPA lysis buffer  
88 (150mM NaCl, 50 mM Tris pH 8.0, 1% v/v IGEPAL, 0.5% v/v sodium deoxycholate, 0.1% v/v SDS, 250 U  
89 Benzonase and supplemented with cOmplete, EDTA-free Protease Inhibitor Cocktail pills (Roche)) and  
90 incubated on ice for 30 minutes. Lysate was matched for total protein by BCA kit (Thermofisher  
91 scientific, cat# 23225). 10  $\mu$ g of total protein lysate was loaded on to an TGX Stain Free FastCast  
92 Acrylamide gel (BioRad, cat# 1610185) and transferred using an iBlot2 gel transfer device (Thermofisher

93 scientific, cat# IB21001) and a PVDF iBlot2 transfer stack (Thermofisher scientific, cat# IB24001). The  
94 membrane was blocked with 5% w/v skim milk powder in phosphate buffered saline (PBS) for 1 hour at  
95 room temperature. Anti-GFP (Invitrogen, cat#A6455) and anti-Cherry (Abcam, cat#167453) were diluted  
96 to 1:10,000 and 1:2500 respectively in PBS containing 0.1% v/v Tween 20 and incubated for 1 hour at  
97 room temperature. The secondary antibody, goat anti-rabbit HRP antibody (Invitrogen, cat#656120),  
98 was diluted 1:10,000 in PBS containing 0.1% v/v Tween 20 and incubated for 1 hour at room  
99 temperature. HRP was detected by enhanced chemiluminescence.

100 **FIAsh staining.** Cells were stained with FIAsh as described previously to demarcate HBRI from PBRI cells  
101 [8]. In essence, the ratio of Cerulean:FIAsh or mCherry:FIAsh fluorescence was determined and all cells  
102 with a ratio greater than one standard error from the mean were classified as HBRI whereas all cells with  
103 a ratio smaller than one standard error from the mean were classified as PBRI.

104 **RNA staining.** Cells were stained for RNA using the Click-iT Plus Alexa Fluor647 Picolyl Azide Toolkit (Life  
105 technologies, cat#C10643) according to manufacture's instructions. In short, 6 hours post-transfection  
106 5-ethynyl uridine (Click-Chemistry tools, cat# 1261-10) was added to cells to a final concentration of 0.4  
107 mM. 24 hours post-transfection cells were stained with FIAsh as described above. Following staining,  
108 cells were fixed with 4% w/v paraformaldehyde and permeabilised with 0.5% w/v Triton X-100 in PBS.  
109 Cells were then washed with 3% w/v bovine serum albumin in PBS followed by Click-It staining according  
110 to manufacturer's instructions using a 1:4 ratio of CuSO<sub>4</sub>: Copper protectant. Nuclei were counter  
111 stained with Hoechst (1:1000) and imaged by confocal microscopy.

112 **HaloTag staining.** After 6 hours post-transfection with the Halo-tagged constructs, TMRDirect ligand  
113 (Promega) was diluted 1:1000 in complete media and added to cells. For imaging, cells were fixed at 24  
114 hours post-transfection with 4% w/v paraformaldehyde. Imaging positions were marked using the "mark

115 and find” feature and then images captured on a Lecia TCS SP5. Cells were then stained with FIAsH as  
116 described above and the positions were re-imaged.

117 **Flow Cytometry.** Cells were analyzed at high flow rate in an LSRFortessa flow cytometer, equipped with  
118 488- and 561-nm lasers (BD Biosciences). 50,000–100,000 events were collected, using a forward scatter  
119 threshold of 5,000. Data were collected in pulse height, area, and width parameters for each channel.  
120 For Cerulean fluorescence, data were collected with the 405-nm laser and BV421 filter (450/50 nm).  
121 TMR fluorescence was collected with the 561-nm laser and using the PE-Texas Red filter (610/20 nm). All  
122 flow cytometry data were preprocessed with FlowJo (Tree Star Inc.) to assign live and inclusion-  
123 containing cells. Cells with inclusions were assessed by Pulse Shape Analysis [18]. The fluorescence  
124 intensity for individual cells in each channel was exported and analysed using custom python scripts  
125 (available at <https://doi.org/10.5281/zenodo.3789864> ). Briefly, cerulean fluorescence was assigned to  
126 20 logarithmic bins spanning the range of recorded intensities. Four logarithmic bins for HaloTag  
127 fluorescence were then assigned (none, low, medium, high) independently for each construct according  
128 to the maximum intensity for that construct. Finally, the proportion of cells containing inclusions within  
129 each combined cerulean-HaloTag bin was calculated.

130 **Immunofluorescence.** Cells were fixed at 24 hours post-transfection with 4% w/v paraformaldehyde for  
131 15 min at room temperature. Cells were then permeabilized with 0.2% v/v Triton X-100 in PBS for 20  
132 mins at room temperature. Samples were blocked in 5% w/v bovine serum albumin in PBS for 1 hour at  
133 room temperature. Cells were stained with anti-GFP (1:300 dilution) (Invitrogen cat# A6455) diluted in  
134 PBS containing 1 % w/v bovine serum albumin and 0.05% v/v Tween 20 for 1 hr at room temperature.  
135 Samples were then incubated in goat anti-rabbit Alexa Fluoro 647 (1:500) (Life technologies cat#A21244)  
136 diluted in PBS containing 1 % w/v bovine serum albumin and 0.05% v/v Tween 20 for 30 mins at room  
137 temperature.

138 **Fluorescence recovery after photobleaching.** Cells were imaged at 37°C and 5% atmospheric CO<sub>2</sub> on an  
139 Olympus FV3000 confocal laser scanning microscope through a 60X 1.2NA water immersion objective.  
140 mCherry fluorescence was excited with a 561 nm solid state laser diode. The resulting fluorescent  
141 emission was directed through a 405/488/561 dichroic mirror to remove laser light and detected by an  
142 internal GaAsP photomultiplier set to collect between 550–650 nm. 24 hours post transfection cells  
143 were FIAsh stained as described above and then imaged. For FRAP, a pre-bleached image was taken  
144 before half the inclusion was bleached for 5 seconds (10% laser power, 200 μs pixel dwell time).  
145 Recovery was then monitored by imaging the inclusions every minute for 21 minutes.

146 **Cell imaging and analysis.** Images of live or fixed cells were acquired with a Leica TCS SP5 confocal  
147 microscope. Anti-GFP images were taken on the Zeiss LSM800 Airyscan. Images were extracted from  
148 proprietary formats using FIJI (v 2.0.0-rc-69/1.52p) equipped with the Bioformats plugin (v6.3.1). The  
149 resultant tiff images were then processed using custom scripts written for FIJI and python (source code  
150 available at <https://doi.org/10.5281/zenodo.3789864> ). Briefly, in the case of RNA- and HaloTag- stained  
151 images, regions of interest (ROI) were manually assigned and the mean fluorescence intensity within  
152 each region exported. In the case of fluorescence recovery after photobleaching, bleached and whole-  
153 cell ROI were assigned via automatic thresholding of the FIAsh and mCherry channels respectively, while  
154 a circular background ROI with a nominal fixed radius (25 pixels in the images) was manually assigned  
155 for each image. Pixel fluorescence intensities for each ROI were exported for all timepoints post-  
156 recovery, and the bleached ROI determined by subtracting the unbleached pixel coordinates from the  
157 whole-cell ROI. The relative recovery was then calculated by dividing the background-corrected mean  
158 intensity in the bleached and non-bleached ROIs. Finally, in the case of anti-GFP antibody penetration,  
159 inclusions were identified by automatic thresholding of the cerulean intensity and the resultant ROI was  
160 scaled by 110% to yield the external inclusion boundary. The internal boundary was determined via  
161 automatic thresholding of the inverted anti-GFP fluorescence. The Euclidean distance between the



162 centroid of the outer ROI and either the internal or external boundary pixels was then calculated, and  
163 the penetration measured as the difference in the mean distance of the internal and external  
164 boundaries.

165 **Statistics.** The statistical tests are described in the figure legends and *P* values shown directly on the  
166 figures or coded as \*,  $P < 0.05$ , \*\*,  $P < 0.01$ , \*\*\*,  $P < 0.001$ ; \*\*\*\*,  $P < 0.0001$ . Statistical tests were  
167 performed in Graphpad Prism v6.

## 168 **RESULTS**

169 We previously postulated the presence of a translation-related quality control mechanism that clears  
170 aggregating or misfolding proteins emerging from the ribosome in cells lacking inclusions. Prior data has  
171 shown that polyglutamine (polyQ)-expanded Httex1 is more efficiently degraded than the wild-type  
172 counterpart, which is consistent with an elevated clearance mechanism at this step [19]. If polyQ-  
173 expanded Httex1 is engaging with quality control during synthesis we might anticipate this to lead to an  
174 interruption of translation rates. Furthermore we previously found, by proteomics, that Upf1 (Rent1),  
175 which plays a central role in non-sense mediated decay [20] was enriched in the inclusions [8]. This  
176 finding raises the possibility that the stalled constructs, should they arise, proceed to nucleate the  
177 aggregation process.

178 First to test for stalling, we implemented a translational stall assay in AD293 cells which are sensitive to  
179 the proteotoxicity of polyQ-expanded Httex1 [8]. The assay involves a reporter cassette containing two  
180 fluorescent reporters on each side of the peptide sequence to be tested for stalling (GFP at the N-  
181 terminus and mCherry at the C-terminus) [21] (**Fig 1A**). Each construct is encoded in frame without stop  
182 codons however the test sequence is flanked by viral P2A sequences, which causes the ribosome to skip  
183 the formation of a peptide bond but otherwise continue translation elongation uninterrupted [22].  
184 Complete translation of the cassette from one ribosome will generate three independent proteins (GFP,

185 test protein, and mCherry). However, should the ribosome stall during synthesis (such as through the  
186 previously established poly-lysine (20K) sequence used here as a control [21]), mCherry is produced at  
187 lower stoichiometries than the GFP. In our hands, we noted that there was a small fraction of protein  
188 synthesized reading through the P2A sequences (**Fig 1B**). Of particular note was the appearance of SDS-  
189 insoluble material in the stacking gel for the mutant polyQ-length form of Httex1 (97Q), which is  
190 indicative of SDS-insoluble mHtt products that arises from aggregation [3] (**Fig 1B**). Because  
191 fluorescence resonance energy transfer (FRET) from GFP to mCherry is anticipated to inflate the  
192 mCherry/GFP fluorescence ratio, and be particularly high in the aggregates, we sought to remove this  
193 confounding factor by redesigning the stall construct to have a more efficient skip sequence [17]. This  
194 involved tandem P2A and T2A sequences, which appeared to reduce the read through effect below  
195 detection by Western Blot (**Fig 1C**). The data shows Httex1 in wild-type (25Q) or mutant (97Q) form to  
196 have an insignificant difference in mCherry/GFP ratios compared to the control construct, although  
197 there was a very small significant difference between the 25Q and 97Q constructs. Collectively these  
198 data suggest that long polyQ sequences do not lead to ribosome stalling, or very small amounts, and  
199 therefore point to the proteotoxicity of soluble Httex1 most likely arising from other factors.

200

201 **Figure 1. Translation of Httex1 is not stalled during synthesis at short or long polyQ lengths in AD293**  
202 **cells. A.** Schematic of the design of the stall reporter assays. GFP and mCherry sequences flank a test  
203 sequence and are expressed in frame. The 20K sequence is a positive stall control containing repeat  
204 AAA sequences as the test sequence. The Control linker is a non-stalling sequence for the test  
205 sequence. In the original assay, the P2A sequence causes the ribosome to skip the formation of a  
206 peptide bond leading to independent protein expression of the three components. If the ribosome  
207 stalls during translation of the test sequence, then the yield of mCherry decreases relative to GFP. In the  
208 modified assay, an additional alternative skip sequence (T2A) was added in tandem to the P2A to reduce

209 the rate of readthrough **B.** Western blots of cells expressing the stall reporters probed with GFP or  
210 mCherry antibodies. Marker molecular weight masses are shown on the left. Products labeled on the  
211 right. **C.** mCherry:GFP fluorescence ratios measured by flow cytometry.

212  
213 Next, we assessed whether the inclusions were enriched with RNA on the possibility that translational  
214 machinery, mRNA and ribosomes included, are coaggregated into the newly formed inclusions. For this  
215 we used a biosensor form of Httex1 (TC9-Httex1) we previously developed that enables us to demarcate  
216 early-formed inclusions from older inclusions [8, 18]. This biosensor involves a tetracysteine tag  
217 embedded near the start of the polyglutamine sequence that can bind to the biarsenical dye FIAsh when  
218 Httex1 is monomeric or forms a disordered aggregate in the early-formed inclusions. In contrast, when  
219 Httex1 is in an amyloid conformation and in the more mature inclusions, it is unable to bind [8]. Using a  
220 flow cytometry method called Pulse Shape analysis, cells containing Httex1 diffusely distributed (ni) or  
221 within inclusions (i) can be separated and then further divided into those Highly Biarsenical-Reactive  
222 (HBR) or Poorly Biarsenical-Reactive (PBR) [18, 23]. The result is the detection of cells with recently  
223 formed inclusions which are reactive to FIAsh (HBri), and cells with mature inclusions which are PBri  
224 [8]. HBri and PBri status can also be determined by microscopy [8].

225 To test for incorporation of RNA we used a Click-It RNA imaging approach, which involves adding 5-  
226 ethynyl uridine (EU) nucleoside to the media that then gets incorporated into newly synthesized RNA  
227 molecules and can be labelled with a fluorophore by click chemistry [24]. EU was rapidly incorporated  
228 into nuclear RNA pools and to a lesser extent the cytoplasm (**Fig 2A–B**). The levels of EU inside the  
229 inclusions was lower than the surrounding cytosol but was higher than background levels of  
230 fluorescence determined by control cells labelled with Alexa 647 in the absence of EU (**Fig 2C**). This  
231 suggests that at best there was a small incorporation of mRNA into the inclusions, however there was no

232 difference between early-formed and later-formed inclusions in the amount of RNA. Hence, if nascent  
233 chain Httex1-ribosome complexes are major drivers of the first stages of aggregation, it is likely that this  
234 occurs after the 40S and 60S ribosome components have split, which would liberate the mRNA (and 40S  
235 subunit) from the stalled 60S-nascent chain complex [25, 26].

236

237 **Figure 2. mRNA is not enriched inside Httex1 inclusions. A.** Confocal images of AD293 cells transfected  
238 with TC9-Httex1(97Q)-Cerulean and stained with FIAsh 16 h after growing in nucleoside analogue 5-  
239 ethynyl uridine. Cells were stained with Hoechst 33342 (nuclei stain), and Alexafluor 647 (RNA). Scale  
240 bar: 10  $\mu$ m. **B.** FIAsh:Cerulean fluorescence ratios with ranges shown that was used to classify the HBRI  
241 and PBRI cells. Bar shows mean and SEM of individual inclusions. **C.** Quantitation of individual images of  
242 cells for intensity of Alexafluor 647 in one focal plane (measured by confocal microscopy). Data points  
243 indicate individual cells. Bars show means and SD. Differences were assessed by ordinary 2 way ANOVA.

244

245 We then examined whether components of the 60S ribosome and other candidate machinery involved  
246 in ribosome quality control (RQC) are enriched in the inclusions. The RQC system is responsible for  
247 monitoring partially synthesised proteins and labelling nascent chains that stall before reaching the stop  
248 codon for destruction [25, 26]. The RQC forms a stable complex with the 60S ribosome which triggers  
249 degradation of the nascent chain via ubiquitylation [26]. The sequence of events include (1) splitting  
250 of the stalled ribosome; (2) assembly of the RQC and ubiquitylation of the nascent chain; (3) extraction  
251 of the nascent chain and then degradation [25].

252 For these experiments, we co-expressed Halo-tagged candidate proteins previously suggested to be  
253 involved in ribosome quality control with TC9-Httex1(97Q), allowed inclusions to form and then stained  
254 for location of the candidate proteins via the HaloTags. This included Rack1 (Gnb2l1), which is a

255 component of the 40S ribosome and is involved in translational repression [27, 28]. Rack1 has previously  
256 been reported to bind to Httex1, which in mutant form was suggested to interfere with protein  
257 translation [29], and is involved in initiating RQC by promoting ubiquitinylation of 40S ribosome subunits  
258 to resolve poly(A)-induced ribosome stalling [30]. We examined listerin (Ltn1) which is an E3 ubiquitin  
259 ligase that is recruited to 60S ribosome subunits close to the nascent chain and ubiquitinylates nascent  
260 chains that become stalled during synthesis [26]. We also investigated another protein not observed as  
261 enriched in inclusions [8] or predicted to be involved in this biology as a negative control, the  $\alpha$  domain-  
262 containing protein 1 (Nacad). Nacad did not appear to colocalize with the inclusions based on HaloTag  
263 staining, yet both Ltn1 and Rack1 were enriched in the outer layer of the inclusions suggesting a specific  
264 enrichment of the RQC machinery to the aggregates (**Fig 3A and B**). The over-expression of these  
265 proteins did not appear to influence the formation of inclusions of Httex1(97Q) (**Fig 3C**).

266

267 **Figure 3. RQC proteins are recruited and enrich in the outer layer of inclusions whilst having no affect**  
268 **on inclusion formation.** AD293 cells were co-transfected with TC9-Httex1(97Q)-Cerulean and Halo-  
269 tagged RQC proteins Rack1 (**A**), Ltn1 (**B**) and Nacad (**C**). HaloTag proteins were visualized by staining with  
270 TMRDirect ligand 24 hour after transfection (scale bar; 10  $\mu$ m). Images (*upper panels*) were then  
271 quantified for enrichment of Halo-tagged proteins in inclusions (*middle panels*). The outer ring denotes  
272 the outer edge of the inclusion which was defined as the outer most area of cerulean fluorescence in the  
273 inclusions. Data points indicate individual cells, with lines connecting matched data. Means are shown  
274 as red dashes. Differences were assessed by repeated measures one way ANOVA with Tukey multiple  
275 comparisons test. Impact of HaloTag protein expression on Httex1(97Q)-Cerulean inclusion formation  
276 was determined by flow cytometry analysis (*lower panels*). Data indicates fraction of cells with  
277 inclusions, as measured by pulse shape analysis for cells categorized into different expression level bins  
278 (Htt levels, Cerulean fluorescence and Halo-tagged protein level, TMR fluorescence). The TMR was

279 categorized into four evenly-spaced expression-level bins for each protein. Points and lines show means,  
280 shaded regions indicate SD.

281

282 To further probe the role of other proteins previously shown to be enriched in Httex1(97Q) inclusions  
283 [8] we overexpressed HaloTagged versions of proteins most enriched proteins in PBRI inclusions (Hspb1,  
284 Sgta, Upf1) and HBRI inclusions (Snu13, Rpl18). Hspb1 (Hsp27), which is a small heat shock protein  
285 involved in chaperone activity, appeared to enrich in the outer layer of Httex1(97Q) inclusions (**Fig 4A**).  
286 Furthermore, at high expression levels, Hspb1 lowered the potential of Httex1 to form inclusions which  
287 suggests it plays a role in mitigating (or reversing) aggregation (**Fig 4A**). Similarly, Sgta, which is a co-  
288 chaperone involved in the Bag6 system and ERAD also enriched to the inner and outer layer of Httex1  
289 and had a more potent effect on suppressing aggregation of Httex1(97Q) at high co-expression levels  
290 (**Fig 4B**). Snu13, which is involved in pre-mRNA splicing, also was enriched in the inner and outer layers  
291 of the Httex1(97Q) inclusions and could suppress the aggregation of Httex1(97Q) (**Fig 4C**). Upf1 also  
292 enriched in the inner and outer edges of the inclusions but did not appear to affect the aggregation  
293 process of Httex1 (**Fig 4D**). Previously we found RPL18 as the most enriched protein in Httex1 inclusions  
294 by proteomics [8]. Halo-tagged Rpl18 was mostly present in the nucleus as punctate structures but  
295 small levels were seen in the cytosol (**Fig 4E**). Endogenous Rpl18 is anticipated to mostly reside in the  
296 nucleolus, ER and cytoplasm based on the Human Protein Atlas database [31]. We did not observe any  
297 evidence of enrichment of Halo-tagged Rpl18 with Httex1 inclusions (HBRI or PBRI). Furthermore, there  
298 was no evidence that the expression level of Halo-tagged Rpl18 affected the aggregation of Httex1 into  
299 inclusions (**Fig 4E**). However, the strong nuclear localization of the Halo-tagged Rpl18 suggests it might  
300 not be properly forming complexes with the ribosomes under these conditions.

301

302 **Figure 4. Recruitment patterns of proteins previously shown to be enriched in Httex1(97Q) inclusions**  
303 **and impact on inclusion assembly** AD293 cells were co-transfected with TC9-Httex1(97Q)-Cerulean and  
304 either chaperones Hspb1 (A) or Sgta (B), splicing proteins Snu13 (C) or Upf1 (D), or ribosome protein  
305 Rpl18 (E). Data is presented in the same manner as Fig 3. Scale bar; 10  $\mu$ m. For proteins where cytosolic  
306 TMR staining could not be seen when other structures were not saturated a second 'high PMT' image  
307 was taken where the PMT was increased to a point when the cytoplasm could then be seen.

308  
309 Our last set of experiments examined the diffusibility of mHttex1 in HBRI versus PBRI to determine  
310 whether the newly formed inclusions comprised of liquid-like mutant Httex1 aggregates as previously  
311 postulated [8, 14, 15]. For this experiment we performed fluorescence recovery after photobleaching  
312 on live AD293 cells expressing the TC9- Httex1(97Q)-mCherry and stained with FIAsh. After bleaching,  
313 both HBRI and PBRI inclusions did not recover over a period of 20 mins, which is consistent with a non-  
314 liquid aggregation state (Fig 5A–B). As a further probe for porosity we immunostained cells with a GFP  
315 antibody to test whether the antibody was able to penetrate the inclusions formed by TC9-Httex1(97Q)  
316 fused to GFP derivative Cerulean. The antibody formed a tight ring around the inclusions of both PBRI  
317 and HBRI, which suggested both inclusion states formed impenetrable aggregates (Fig 5C) and there was  
318 no statistical difference in penetration distance of the antibody staining between the HBRI and PBRI  
319 suggesting that inclusions form a dense, and immobile core structure quickly after formation (Fig 5D).

320  
321 **Figure 5. Httex1 molecules are immobile within early and later-formed inclusions.** FRAP experiments  
322 tracking the recovery of mCherry fluorescence in regions of bleached HBRI (A) and PBRI (B) inclusions.  
323 Cells were expressing TC9-tagged Httex1 as a fusion to mCherry. Shown are representative images of  
324 inclusions before (pre-bleached), immediately after bleaching (t0) and at the endpoint (t21) following

325 recovery. Plots show fluorescence recovery in the bleached region for individual inclusions. **C.**  
326 Inclusions in cells expressing Httex1 fusions to Cerulean are impervious to anti-GFP antibodies. Shown  
327 are representative images of anti-GFP stained inclusions for HBRI and PBRI (scale bar: 10  $\mu$ m) **D.**  
328 Quantitation of antibody penetration distance into inclusions (pixels) from confocal images of  
329 immunostained inclusions in situ in cells. Individual inclusions are shown as well as means  $\pm$  SD. There  
330 was no statistical difference as assessed by a two tailed t-test ( $P=0.1641$ ).

331

## 332 **DISCUSSION**

333 Our data here suggests that expression of Httex1, at wild-type or mutant polyQ lengths, does not stall  
334 on the ribosome during translation. As we wrote this manuscript a study was published that suggested  
335 Htt has a physiological function of binding to ribosomes and slowing the speed of ribosome  
336 translocation of many target mRNAs [32]. Intriguingly, mutant Htt further slowed protein synthesis rates  
337 [32]. These data suggest that Httex1 may be slowing translation in trans rather than in cis (through  
338 nascent Httex1-driven stalling). This data therefore raises the possibility that mutant Httex1 does not  
339 itself stall during synthesis but upon aggregation can sequester proteins similarly involved in regulating  
340 ribosome translocation, and potentially those involved in ribosome quality control, into mutant Httex1  
341 inclusions. This mechanism likely would involve the co-aggregation of Httex1 with the endogenous full  
342 length Htt that exerts the physiological activity. It is important to note that our constructs contained  
343 mixed CAG and CAA codons of glutamine, which is different to the mostly homogenous CAG repeats  
344 seen in the human disease [1]. Other studies of polylysine encoded by repeating AAA codons stall much  
345 more effectively than polylysine encoded by mixed AAG and AAA lysine codons, or just AAG codons[33,  
346 34]. The mechanism of stalling was explained in this case by contributions from both RNA and protein  
347 [34].



348 Previously it was shown that inclusions formed in yeast constitutively expressing mHtt(72Q)-GFP had a  
349 diffusible core suggestive of a liquid-like state [15]. Also it has been shown that Httex1 can form  
350 droplets in vitro and liquid-like states in cells [14]. We did not observe any evidence of liquid-like states  
351 in early or late-formed inclusions. It remains possible that the early-formed inclusions detected by our  
352 dyes have already solidified into a gel state but remain disordered by the time we assessed them. It also  
353 remains possible that the structures observed in other studies are distinct to what we observed.

354 Of the proteins that were co-aggregated Sgta, Snu13 and Upf1 were mildly enriched inside the inclusion  
355 whereas Rack1, Ltn1 and Hspb1 were only or more extensively enriched on the outside edge of the  
356 inclusion. Previously it was shown that Hspb1 can form molecular condensates, which raises the  
357 possibility of a mixed phase separation process with polyQ that may explain some of the co-aggregation  
358 mechanism [35, 36]. Nonetheless, the overexpression of the proteins involved in ribosome quality  
359 control did not alter the aggregation propensity. This result is more consistent with them playing non  
360 rate-limiting roles if they are involved in aggregation or clearance, or indeed acting as bystanders that  
361 do not play a critical role in mediating inclusion formation but are co-aggregated.

362 In conclusion, our data suggests that nascent chains of mutant Httex1 emergent from the ribosome are  
363 unlikely to stall and therefore unlikely to drive inclusion formation as stalled entities. However, given  
364 that we did see some ribosome-associated proteins co-aggregating as well as other proteins we  
365 previously identified as enriched in inclusions by proteomics, it remains possible that newly synthesized  
366 nascent Httex1 contributes to the aggregation process substoichiometrically by nucleating further  
367 association of post translated pools of Httex1. Alternatively, it is possible that aggregation of mHttex1  
368 can co-aggregate with endogenous Htt that is engaging in a physiological function of regulating  
369 ribosome translocation rates, and thereby drawing translation machinery into the inclusions in trans.  
370 Both contexts are consistent with other reports of pre-existing pools of Httex1 monomer and small  
371 oligomers being quickly absconded into the inclusion once they form [37].

372 **Competing interests**

373 No competing interests were disclosed.

374 **Grant information**

375 This work was funded by grants and fellowships from the National Health and Medical Research Council  
376 Project to D.M.H. (APP1184166, APP1161803, APP1102059, APP1154352).

377 **REFERENCES**

- 378 1. MacDonald ME, Ambrose CM, Duyao MP, Myers RH, Lin C, Srinidhi L, et al. A Novel Gene  
379 Containing a Trinucleotide Repeat that is Expanded and Unstable on Huntington's Disease  
380 Chromosomes. *Cell*. 1993;72(6):971-83.
- 381 2. Scherzinger E, Sittler A, Schweiger K, Heiser V, Lurz R, Hasenbank R, et al. Self-assembly of  
382 polyglutamine-containing huntingtin fragments into amyloid-like fibrils: implications for  
383 Huntington's disease pathology. *Proc Natl Acad Sci U S A*. 1999;96(8):4604-9. Epub 1999/04/14.  
384 doi: 10.1073/pnas.96.8.4604. PubMed PMID: 10200309; PubMed Central PMCID: PMC16379.
- 385 3. Scherzinger E, Lurz R, Turmaine M, Mangiarini L, Hollenbach B, Hasenbank R, et al. Huntingtin-  
386 encoded Polyglutamine Expansions Form Amyloid-like Protein Aggregates *In Vitro* and *In Vivo*.  
387 *Cell*. 1997;90(3):549-58. PubMed PMID: 9267034.
- 388 4. DiFiglia M, Sapp E, Chase KO, Davies SW, Bates GP, Vonsattel JP, et al. Aggregation of huntingtin in  
389 neuronal intranuclear inclusions and dystrophic neurites in brain. *Science*. 1997;277(5334):1990-  
390 3. PubMed PMID: 9302293.
- 391 5. Davies SW, Turmaine M, Cozens BA, DiFiglia M, Sharp AH, Ross CA, et al. Formation of neuronal  
392 intranuclear inclusions underlies the neurological dysfunction in mice transgenic for the HD  
393 mutation. *Cell*. 1997;90(3):537-48. PubMed PMID: 9267033.

- 394 6. von Horsten S, Schmitt I, Nguyen HP, Holzmann C, Schmidt T, Walther T, et al. Transgenic rat  
395 model of Huntington's disease. *Hum Mol Genet.* 2003;12(6):617-24. doi: 10.1093/hmg/ddg075.  
396 PubMed PMID: 12620967.
- 397 7. Yang S-H, Cheng P-H, Banta H, Piotrowska-Nitsche K, Yang J-J, Cheng ECH, et al. Towards a  
398 transgenic model of Huntington's disease in a non-human primate. *Nature.* 2008;453(7197):921-  
399 4. doi: [http://www.nature.com/nature/journal/v453/n7197/supinfo/nature06975\\_S1.html](http://www.nature.com/nature/journal/v453/n7197/supinfo/nature06975_S1.html).
- 400 8. Ramdzan YM, Trubetskov MM, Ormsby AR, Newcombe EA, Sui X, Tobin MJ, et al. Huntingtin  
401 Inclusions Trigger Cellular Quiescence, Deactivate Apoptosis, and Lead to Delayed Necrosis. *Cell*  
402 *Rep.* 2017;19(5):919-27. Epub 2nd May 2017. doi: 10.1016/j.celrep.2017.04.029. PubMed PMID:  
403 28467905.
- 404 9. Lajoie P, Snapp EL. Formation and Toxicity of Soluble Polyglutamine Oligomers in Living Cells. *PLoS*  
405 *ONE.* 2011;5(12):e15245.
- 406 10. Takahashi T, Kikuchi S, Katada S, Nagai Y, Nishizawa M, Onodera O. Soluble Polyglutamine  
407 Oligomers Formed Prior to Inclusion Body Formation are Cytotoxic. *Hum Mol Genet.*  
408 2007;17(3):345-6. doi: 10.1093/hmg/ddm311.
- 409 11. Leitman J, Ulrich Hartl F, Lederkremer GZ. Soluble forms of polyQ-expanded huntingtin rather  
410 than large aggregates cause endoplasmic reticulum stress. *Nat Commun.* 2013;4:2753. Epub  
411 2013/11/13. doi: 10.1038/ncomms3753. PubMed PMID: 24217578.
- 412 12. Nucifora LG, Burke KA, Feng X, Arbez N, Zhu S, Miller J, et al. Identification of novel potentially  
413 toxic oligomers formed in vitro from mammalian-derived expanded huntingtin exon-1 protein. *J*  
414 *Biol Chem.* 2012;287(19):16017-28. doi: 10.1074/jbc.M111.252577. PubMed PMID: 22433867;  
415 PubMed Central PMCID: PMC3346083.

- 416 13. Hatters DM. Putting huntingtin "aggregation" in view with windows into the cellular milieu. *Curr*  
417 *Top Med Chem.* 2012;12(22):2611-22. Epub 2013/01/24. PubMed PMID: 23339311.
- 418 14. Peskett TR, Rau F, O'Driscoll J, Patani R, Lowe AR, Saibil HR. A Liquid to Solid Phase Transition  
419 Underlying Pathological Huntingtin Exon1 Aggregation. *Mol Cell.* 2018;70(4):588-601 e6. Epub  
420 2018/05/15. doi: 10.1016/j.molcel.2018.04.007. PubMed PMID: 29754822; PubMed Central  
421 PMCID: PMC5971205.
- 422 15. Aktar F, Burudpakdee C, Polanco M, Pei S, Swayne TC, Lipke PN, et al. The huntingtin inclusion is a  
423 dynamic phase-separated compartment. *Life Sci Alliance.* 2019;2(5):e201900489. Epub  
424 2019/09/19. doi: 10.26508/lsa.201900489. PubMed PMID: 31527136; PubMed Central PMCID:  
425 PMCPMC6749095.
- 426 16. Radwan M, Ang CS, Ormsby AR, Cox D, Daly JC, Reid GE, et al. Arginine in C9ORF72 dipolypeptides  
427 mediates promiscuous proteome binding and multiple modes of toxicity. *Mol Cell Proteomics.*  
428 2020. Epub 2020/02/23. doi: 10.1074/mcp.RA119.001888. PubMed PMID: 32086375.
- 429 17. Liu Z, Chen O, Wall JBJ, Zheng M, Zhou Y, Wang L, et al. Systematic comparison of 2A peptides for  
430 cloning multi-genes in a polycistronic vector. *Sci Rep.* 2017;7(1):2193. Epub 2017/05/21. doi:  
431 10.1038/s41598-017-02460-2. PubMed PMID: 28526819; PubMed Central PMCID:  
432 PMCPMC5438344.
- 433 18. Ramdzan YM, Polling S, Chia CP, Ng IH, Ormsby AR, Croft NP, et al. Tracking protein aggregation  
434 and mislocalization in cells with flow cytometry. *Nat Methods.* 2012;9(5):467-70. Epub  
435 2012/03/20. doi: 10.1038/nmeth.1930. PubMed PMID: 22426490.
- 436 19. Tsvetkov AS, Arrasate M, Barmada S, Ando DM, Sharma P, Shaby BA, et al. Proteostasis of  
437 polyglutamine varies among neurons and predicts neurodegeneration. *Nat Chem Biol.*  
438 2013;9(9):586-92. doi: 10.1038/nchembio.1308

- 439 <http://www.nature.com/nchembio/journal/v9/n9/abs/nchembio.1308.html#supplementary->  
440 [information](#).
- 441 20. Lykke-Andersen J, Bennett EJ. Protecting the proteome: Eukaryotic cotranslational quality control  
442 pathways. *J Cell Biol.* 2014;204(4):467-76. Epub 2014/02/19. doi: 10.1083/jcb.201311103.  
443 PubMed PMID: 24535822; PubMed Central PMCID: PMC3926952.
- 444 21. Juskiewicz S, Hegde RS. Initiation of Quality Control during Poly(A) Translation Requires Site-  
445 Specific Ribosome Ubiquitination. *Mol Cell.* 2017;65(4):743-50 e4. Epub 2017/01/10. doi:  
446 10.1016/j.molcel.2016.11.039. PubMed PMID: 28065601; PubMed Central PMCID:  
447 PMCPMC5316413.
- 448 22. Donnelly ML, Luke G, Mehrotra A, Li X, Hughes LE, Gani D, et al. Analysis of the aphthovirus 2A/2B  
449 polyprotein 'cleavage' mechanism indicates not a proteolytic reaction, but a novel translational  
450 effect: a putative ribosomal 'skip'. *J Gen Virol.* 2001;82(Pt 5):1013-25. Epub 2001/04/12. doi:  
451 10.1099/0022-1317-82-5-1013. PubMed PMID: 11297676.
- 452 23. Olshina MA, Angley LM, Ramdzan YM, Tang J, Bailey MF, Hill AF, et al. Tracking mutant huntingtin  
453 aggregation kinetics in cells reveals three major populations that include an invariant oligomer  
454 pool. *J Biol Chem.* 2010;285(28):21807-16. doi: 10.1074/jbc.M109.084434. PubMed PMID:  
455 20444706; PubMed Central PMCID: PMC2898425.
- 456 24. Jao CY, Salic A. Exploring RNA transcription and turnover in vivo by using click chemistry. *Proc Natl*  
457 *Acad Sci U S A.* 2008;105(41):15779-84. Epub 2008/10/09. doi: 10.1073/pnas.0808480105.  
458 PubMed PMID: 18840688; PubMed Central PMCID: PMCPMC2572917.
- 459 25. Brandman O, Hegde RS. Ribosome-associated protein quality control. *Nat Struct Mol Biol.*  
460 2016;23(1):7-15. doi: 10.1038/nsmb.3147.

- 461 26. Joazeiro CAP. Ribosomal Stalling During Translation: Providing Substrates for Ribosome-  
462 Associated Protein Quality Control. *Annual Review of Cell and Developmental Biology*.  
463 2017;33(1):343-68. doi: 10.1146/annurev-cellbio-111315-125249. PubMed PMID: 28715909.
- 464 27. Kuroha K, Akamatsu M, Dimitrova L, Ito T, Kato Y, Shirahige K, et al. Receptor for activated C  
465 kinase 1 stimulates nascent polypeptide-dependent translation arrest. *EMBO Rep*.  
466 2010;11(12):956-61. Epub 2010/11/13. doi: 10.1038/embor.2010.169. PubMed PMID: 21072063;  
467 PubMed Central PMCID: PMCPMC2999862.
- 468 28. Gandin V, Gutierrez GJ, Brill LM, Varsano T, Feng Y, Aza-Blanc P, et al. Degradation of newly  
469 synthesized polypeptides by ribosome-associated RACK1/c-Jun N-terminal kinase/eukaryotic  
470 elongation factor 1A2 complex. *Mol Cell Biol*. 2013;33(13):2510-26. Epub 2013/04/24. doi:  
471 10.1128/MCB.01362-12. PubMed PMID: 23608534; PubMed Central PMCID: PMCPMC3700114.
- 472 29. Culver BP, Savas JN, Park SK, Choi JH, Zheng S, Zeitlin SO, et al. Proteomic analysis of wild-type and  
473 mutant huntingtin-associated proteins in mouse brains identifies unique interactions and  
474 involvement in protein synthesis. *J Biol Chem*. 2012;287(26):21599-614. Epub 2012/05/05. doi:  
475 10.1074/jbc.M112.359307. PubMed PMID: 22556411; PubMed Central PMCID: PMCPMC3381125.
- 476 30. Sundaramoorthy E, Leonard M, Mak R, Liao J, Fulzele A, Bennett EJ. ZNF598 and RACK1 Regulate  
477 Mammalian Ribosome-Associated Quality Control Function by Mediating Regulatory 40S  
478 Ribosomal Ubiquitylation. *Mol Cell*. 2017;65(4):751-60.e4. Epub 2017/01/31. doi:  
479 10.1016/j.molcel.2016.12.026. PubMed PMID: 28132843; PubMed Central PMCID:  
480 PMCPMC5321136.
- 481 31. Uhlen M, Fagerberg L, Hallstrom BM, Lindskog C, Oksvold P, Mardinoglu A, et al. Proteomics.  
482 Tissue-based map of the human proteome. *Science*. 2015;347(6220):1260419. Epub 2015/01/24.  
483 doi: 10.1126/science.1260419. PubMed PMID: 25613900.

- 484 32. Eshraghi M, Karunadharma P, Blin J, Shahani N, Ricci E, Michel A, et al. Global ribosome profiling  
485 reveals that mutant huntingtin stalls ribosomes and represses protein synthesis independent of  
486 fragile X mental retardation protein. *bioRxiv*. 2019:629667. doi: 10.1101/629667.
- 487 33. Arthur L, Pavlovic-Djuranovic S, Smith-Koutmou K, Green R, Szczesny P, Djuranovic S. Translational  
488 control by lysine-encoding A-rich sequences. *Sci Adv*. 2015;1(6). Epub 2015/09/01. doi:  
489 10.1126/sciadv.1500154. PubMed PMID: 26322332; PubMed Central PMCID: PMC4552401.
- 490 34. Chandrasekaran V, Juskiewicz S, Choi J, Puglisi JD, Brown A, Shao S, et al. Mechanism of ribosome  
491 stalling during translation of a poly(A) tail. *Nat Struct Mol Biol*. 2019;26(12):1132-40. Epub  
492 2019/11/27. doi: 10.1038/s41594-019-0331-x. PubMed PMID: 31768042; PubMed Central PMCID:  
493 PMC6900289.
- 494 35. Morelli FF, Verbeek DS, Bertacchini J, Vinet J, Mediani L, Marmioli S, et al. Aberrant Compartment  
495 Formation by HSPB2 Mislocalizes Lamin A and Compromises Nuclear Integrity and Function. *Cell*  
496 *Rep*. 2017;20(9):2100-15. Epub 2017/08/31. doi: 10.1016/j.celrep.2017.08.018. PubMed PMID:  
497 28854361; PubMed Central PMCID: PMC5583511.
- 498 36. Liu Z, Zhang S, Gu J, Tong Y, Li Y, Gui X, et al. Hsp27 chaperones FUS phase separation under the  
499 modulation of stress-induced phosphorylation. *Nat Struct Mol Biol*. 2020;27(4):363-72. Epub  
500 2020/04/02. doi: 10.1038/s41594-020-0399-3. PubMed PMID: 32231288.
- 501 37. Ossato G, Digman MA, Aiken C, Lukacsovich T, Marsh JL, Gratton E. A two-step path to inclusion  
502 formation of huntingtin peptides revealed by number and brightness analysis. *Biophys J*.  
503 2010;98(12):3078-85. Epub 2010/06/17. doi: 10.1016/j.bpj.2010.02.058. PubMed PMID:  
504 20550921; PubMed Central PMCID: PMC2884247.
- 505
- 506

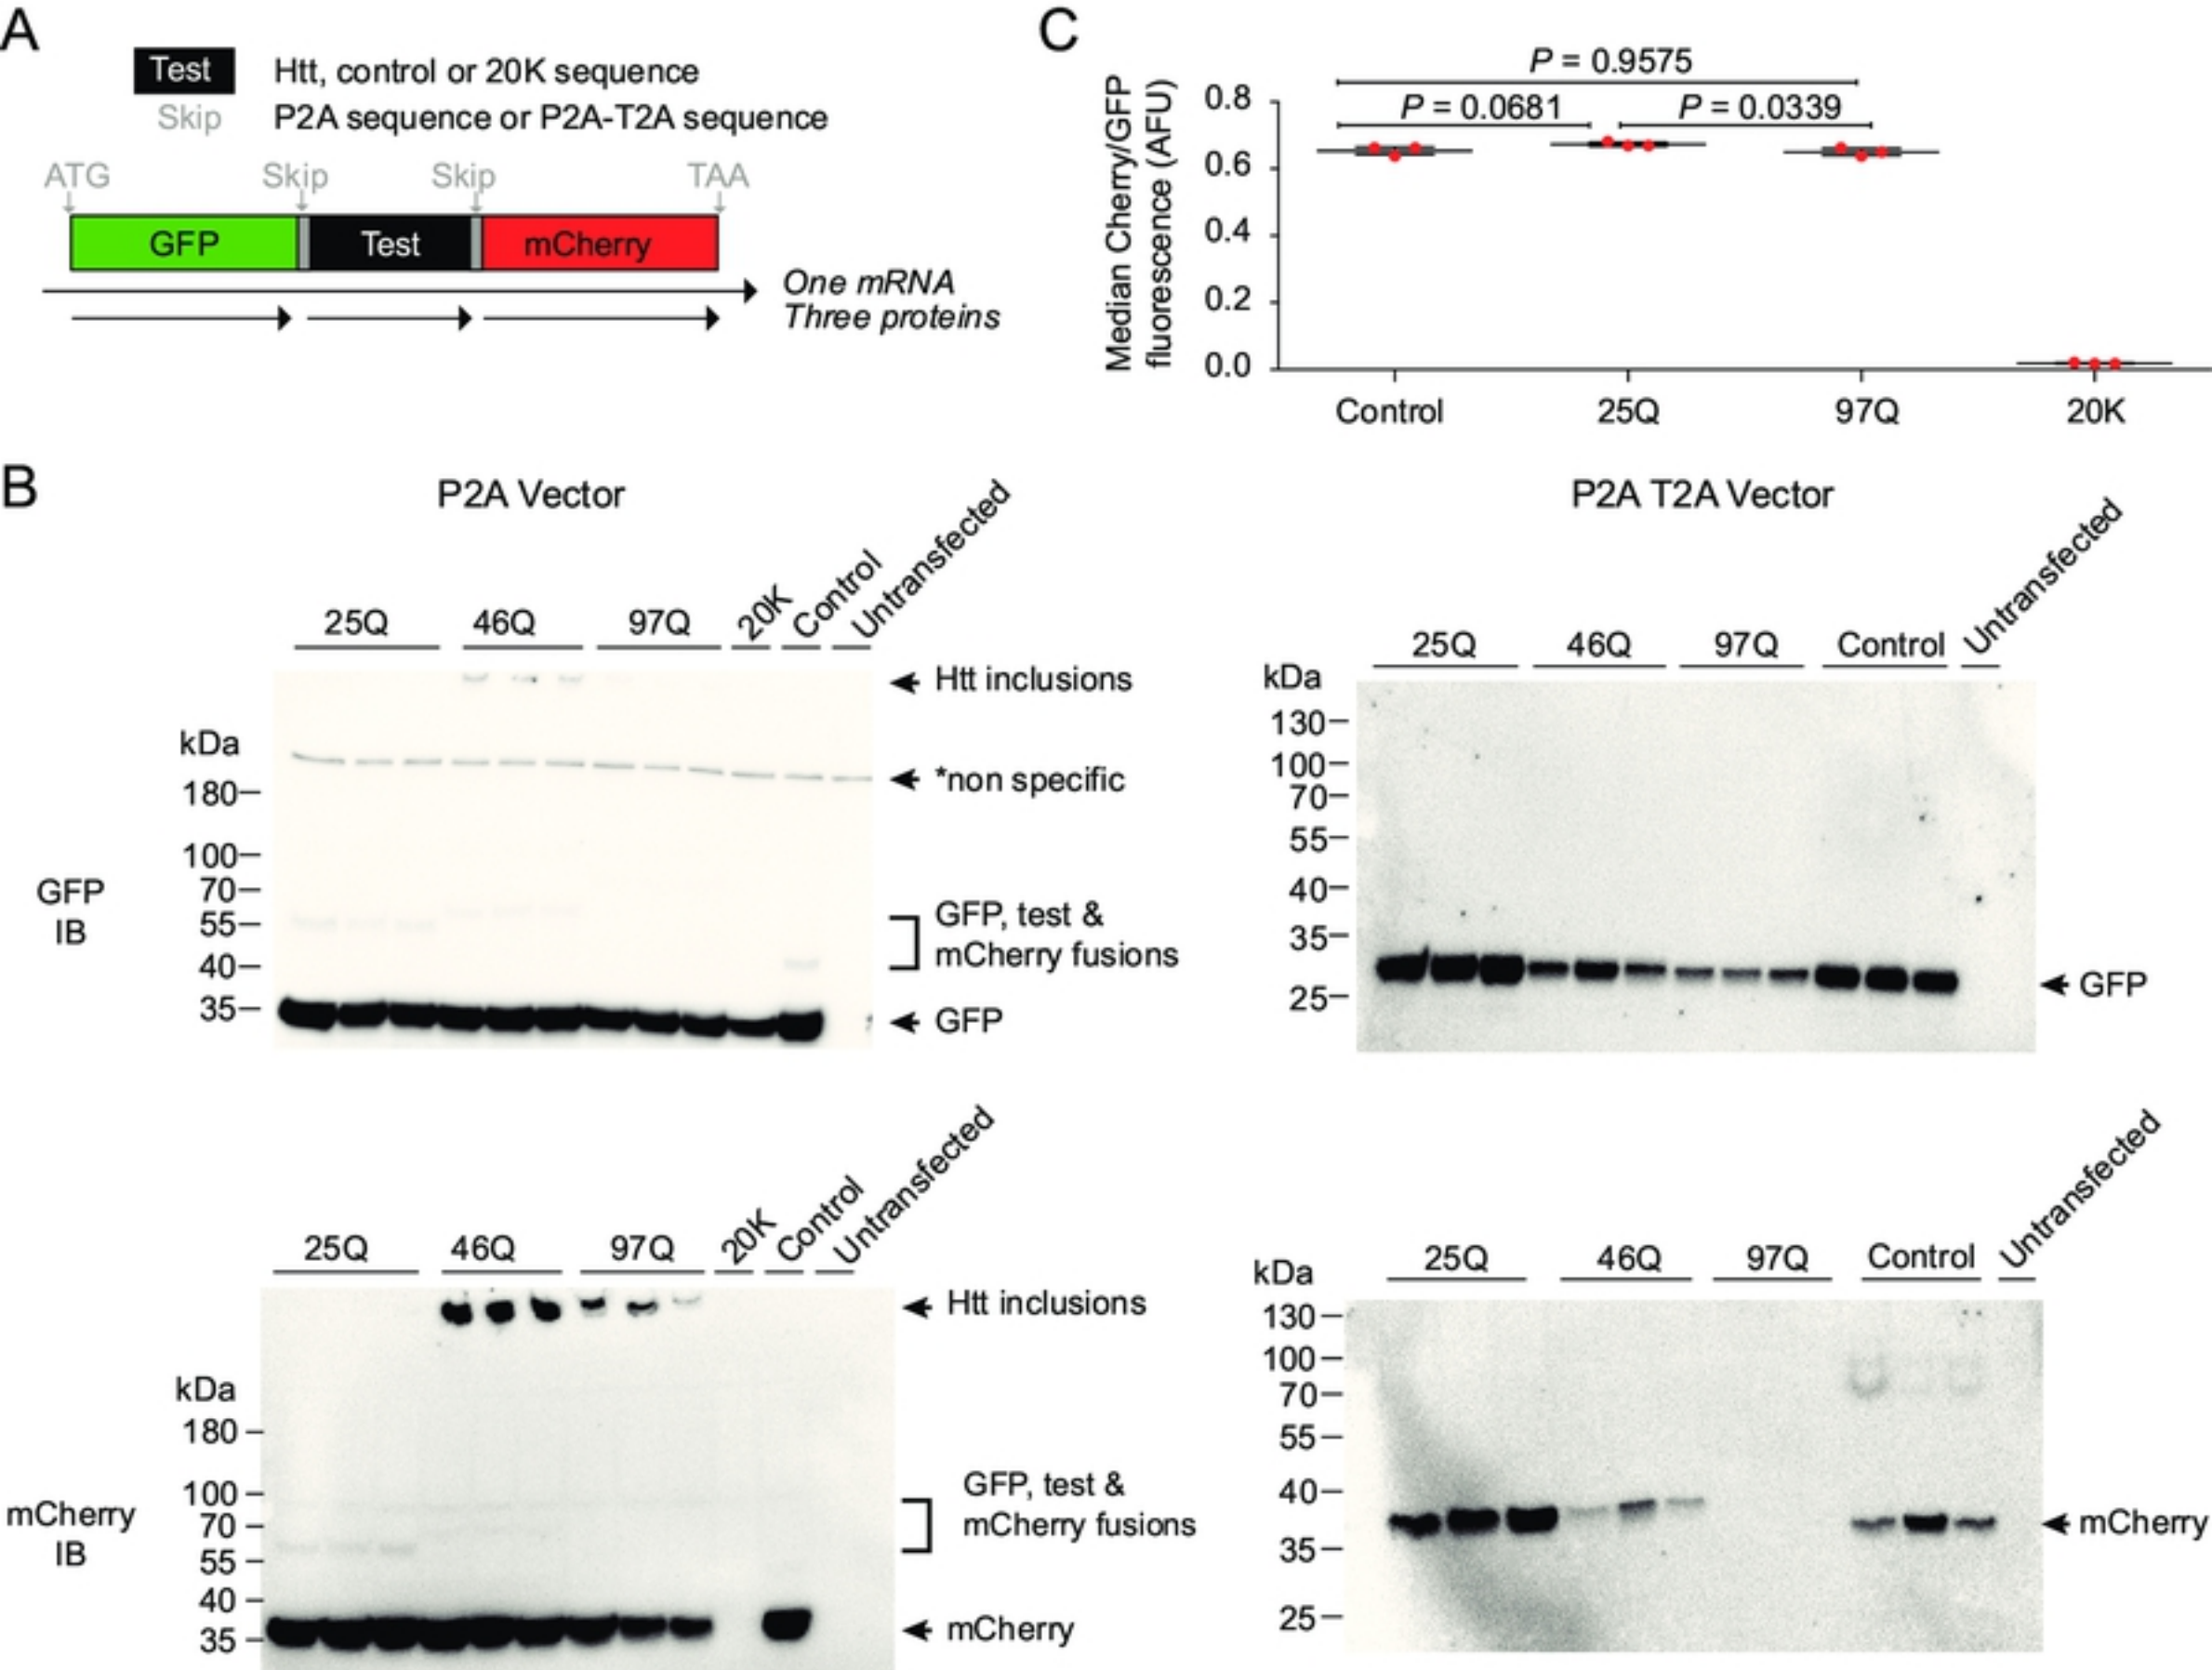

Fig 1



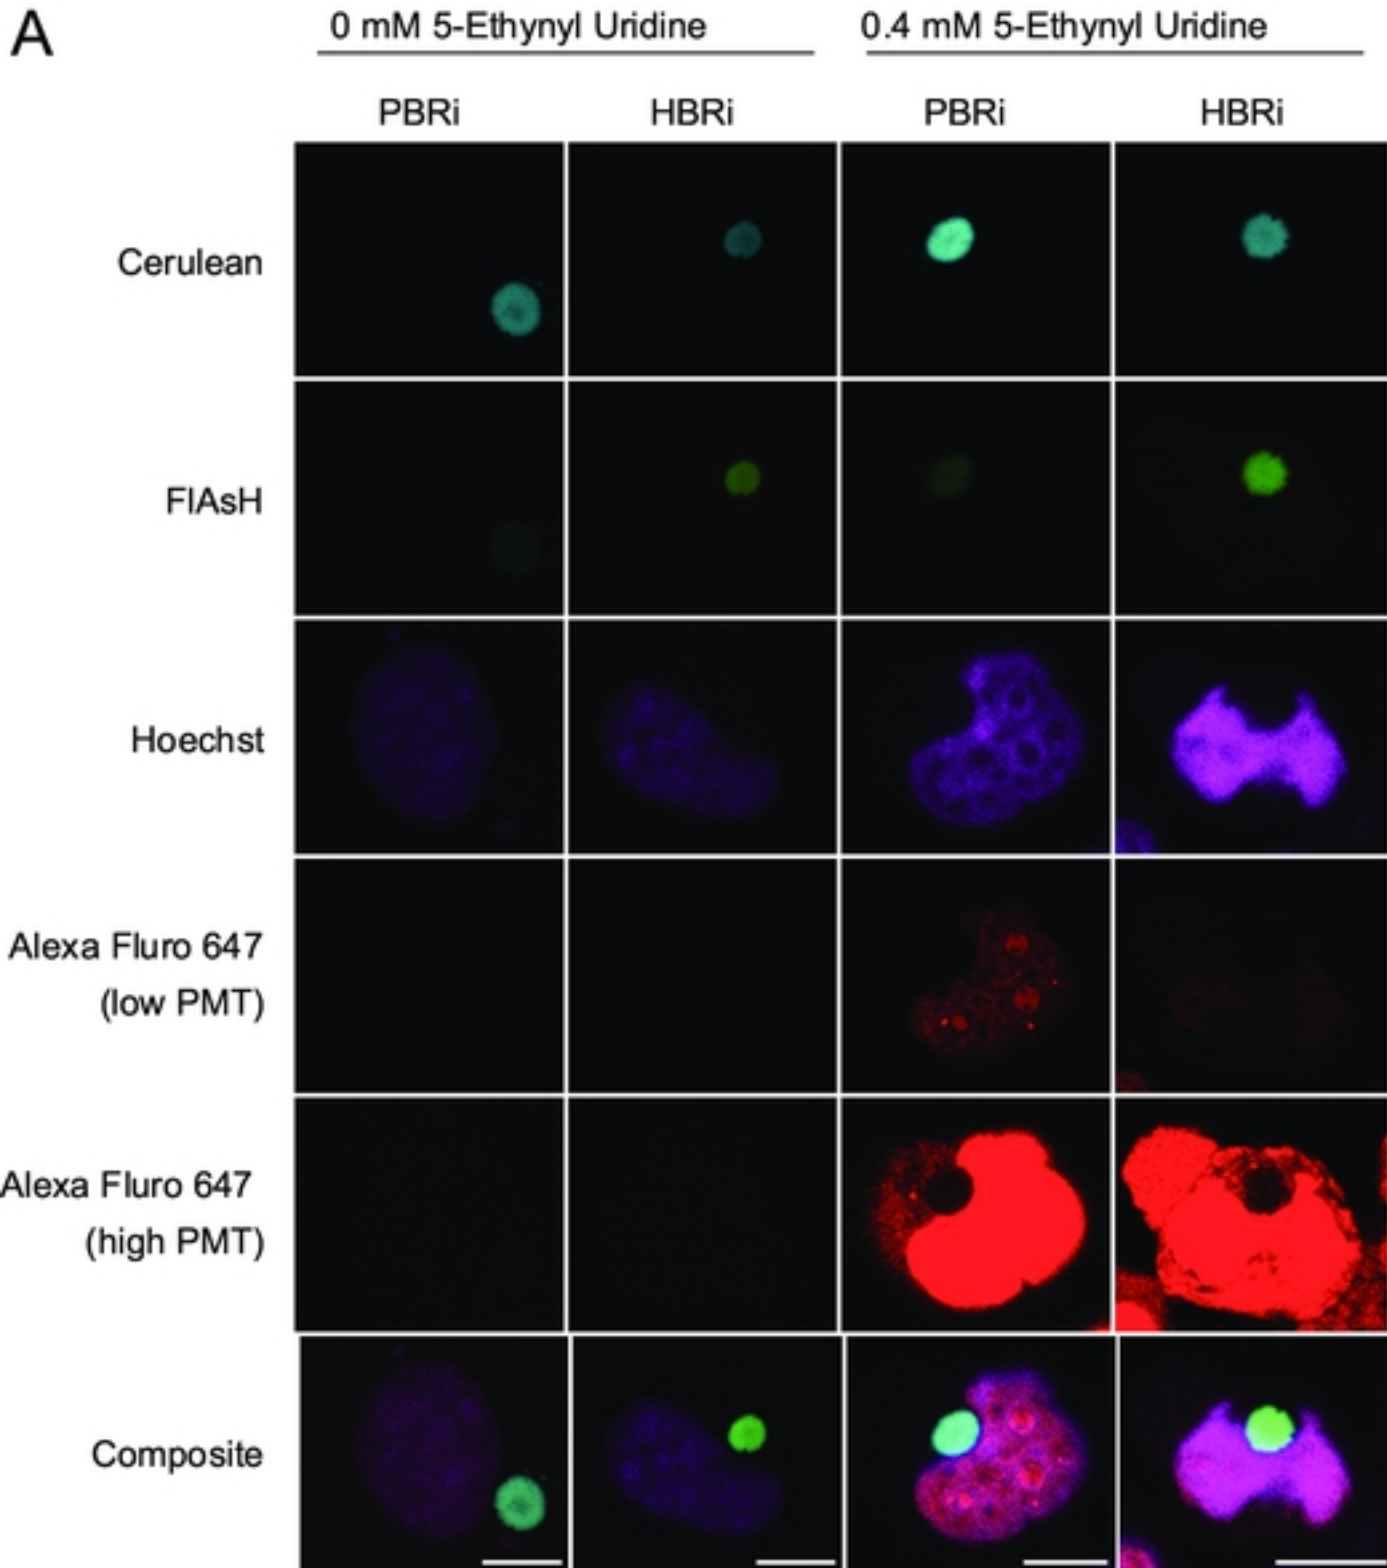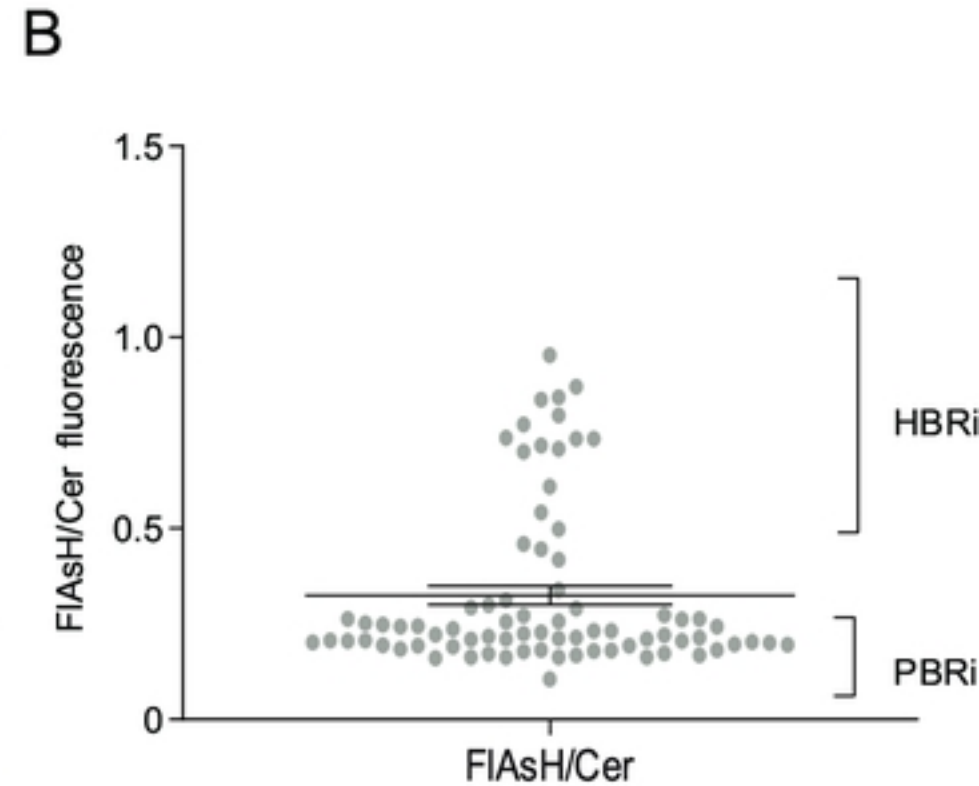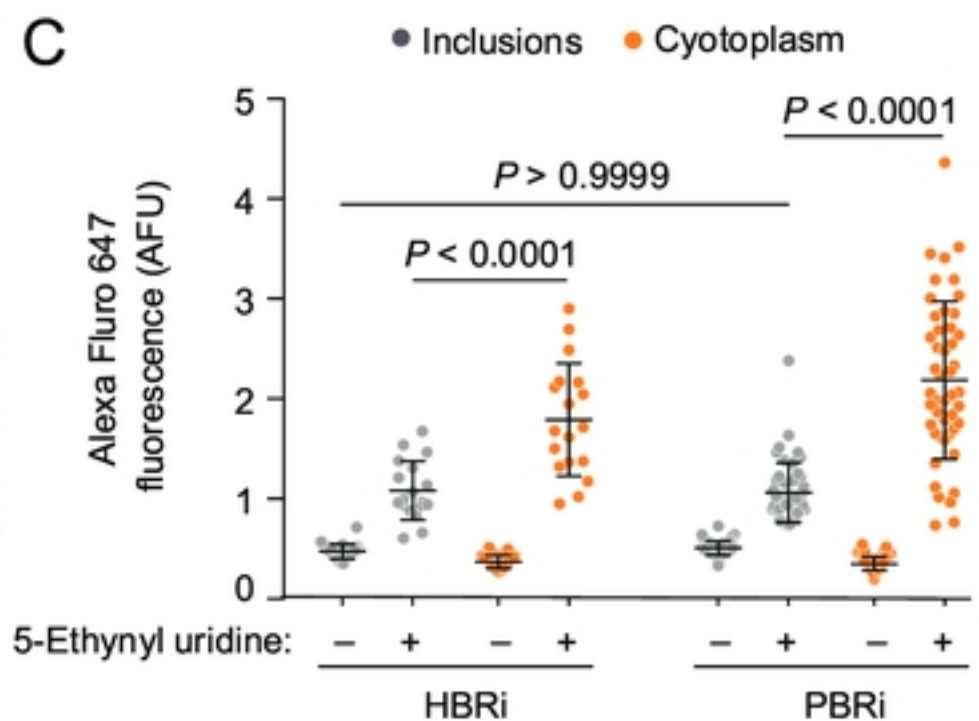

Fig 2

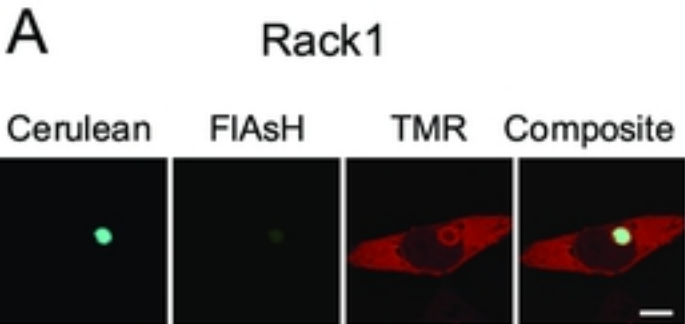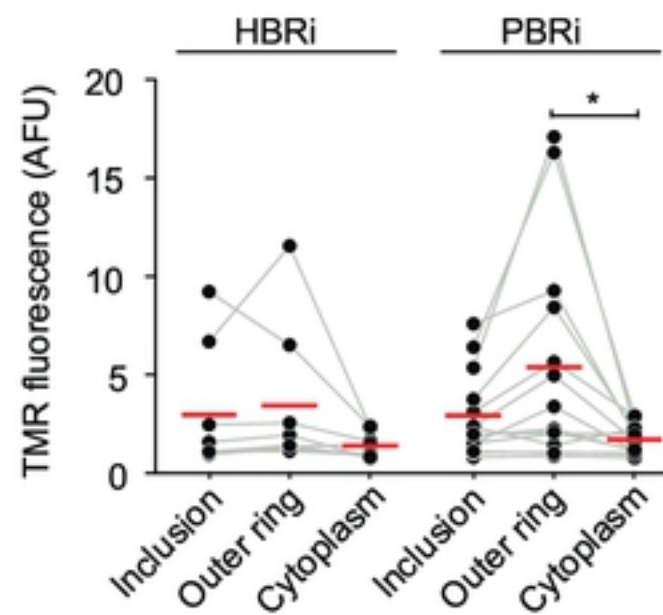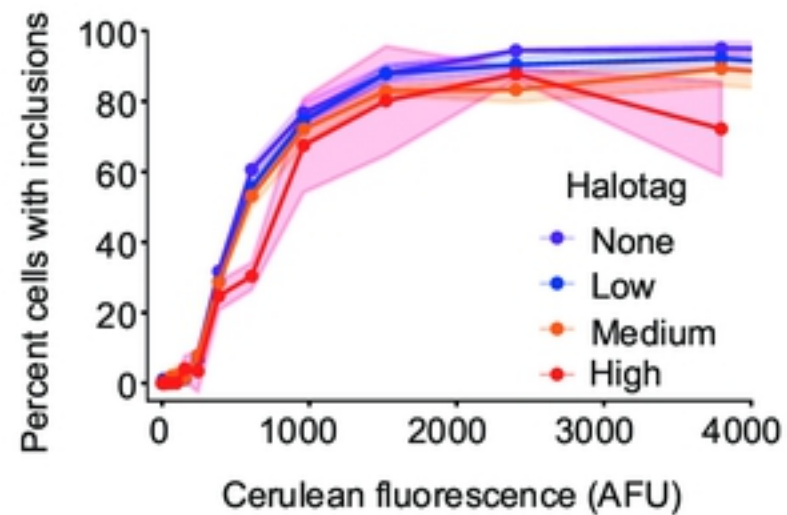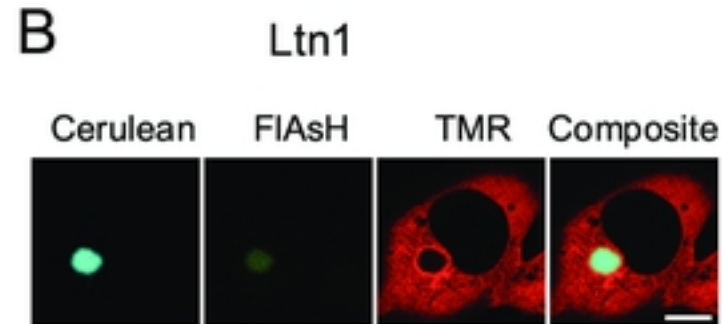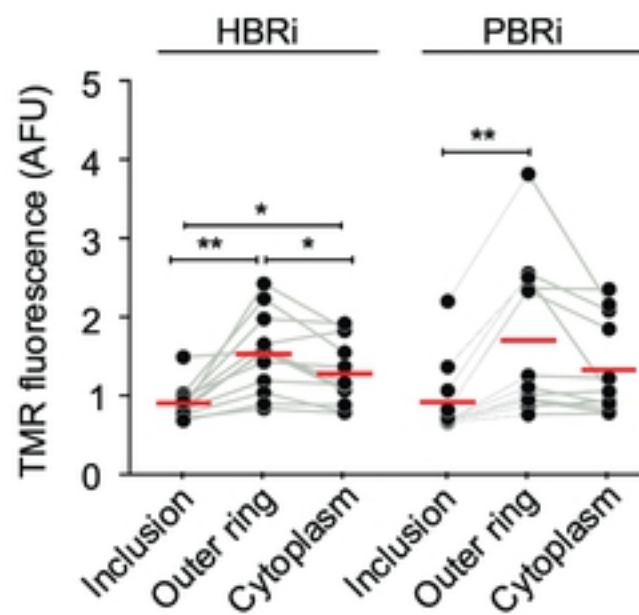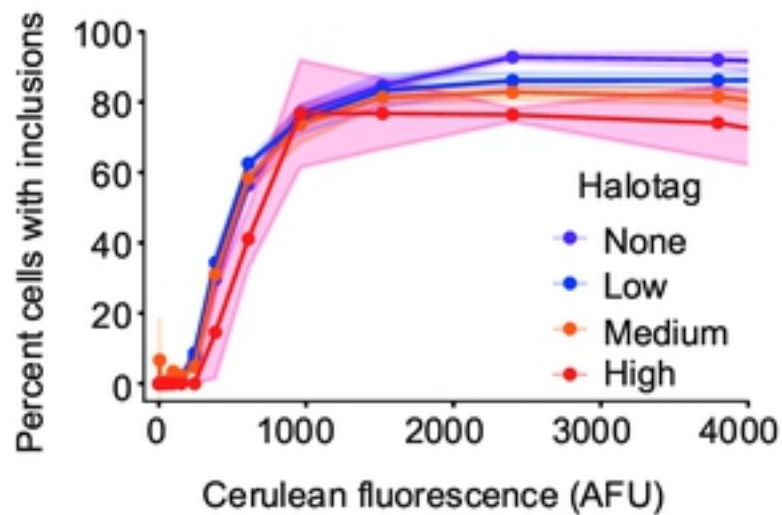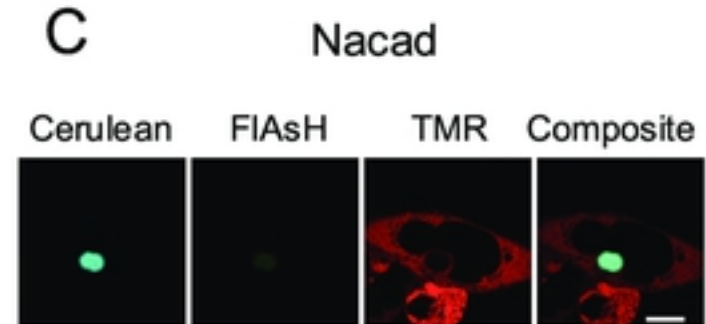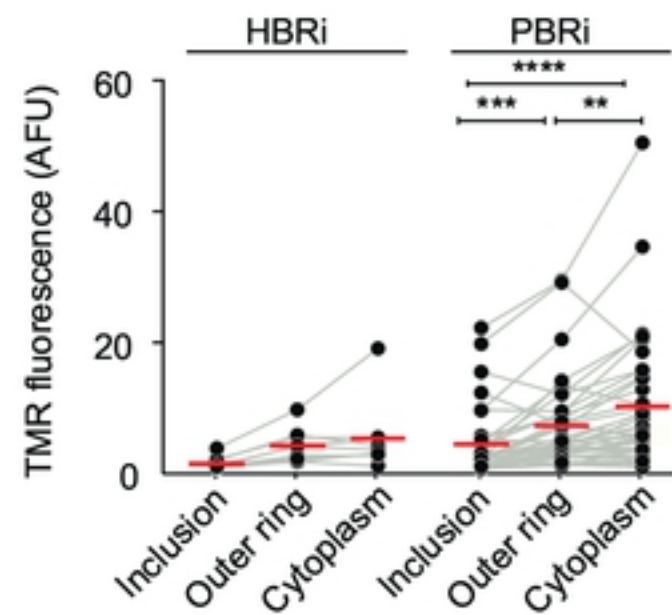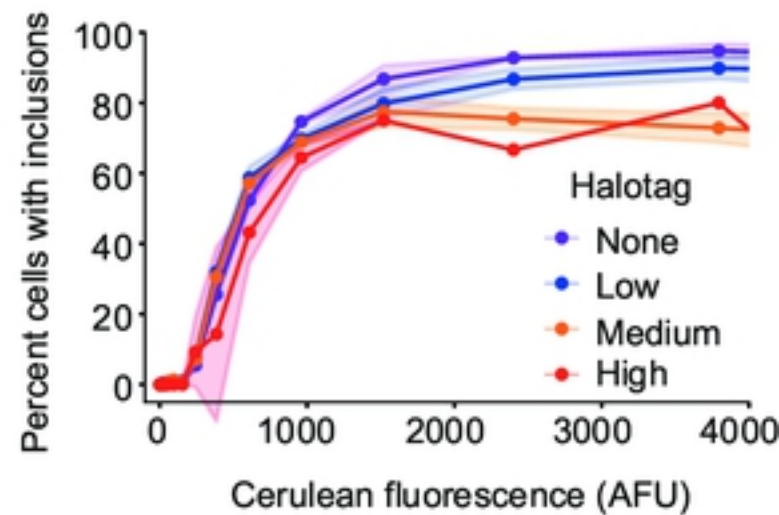

**Fig 3**

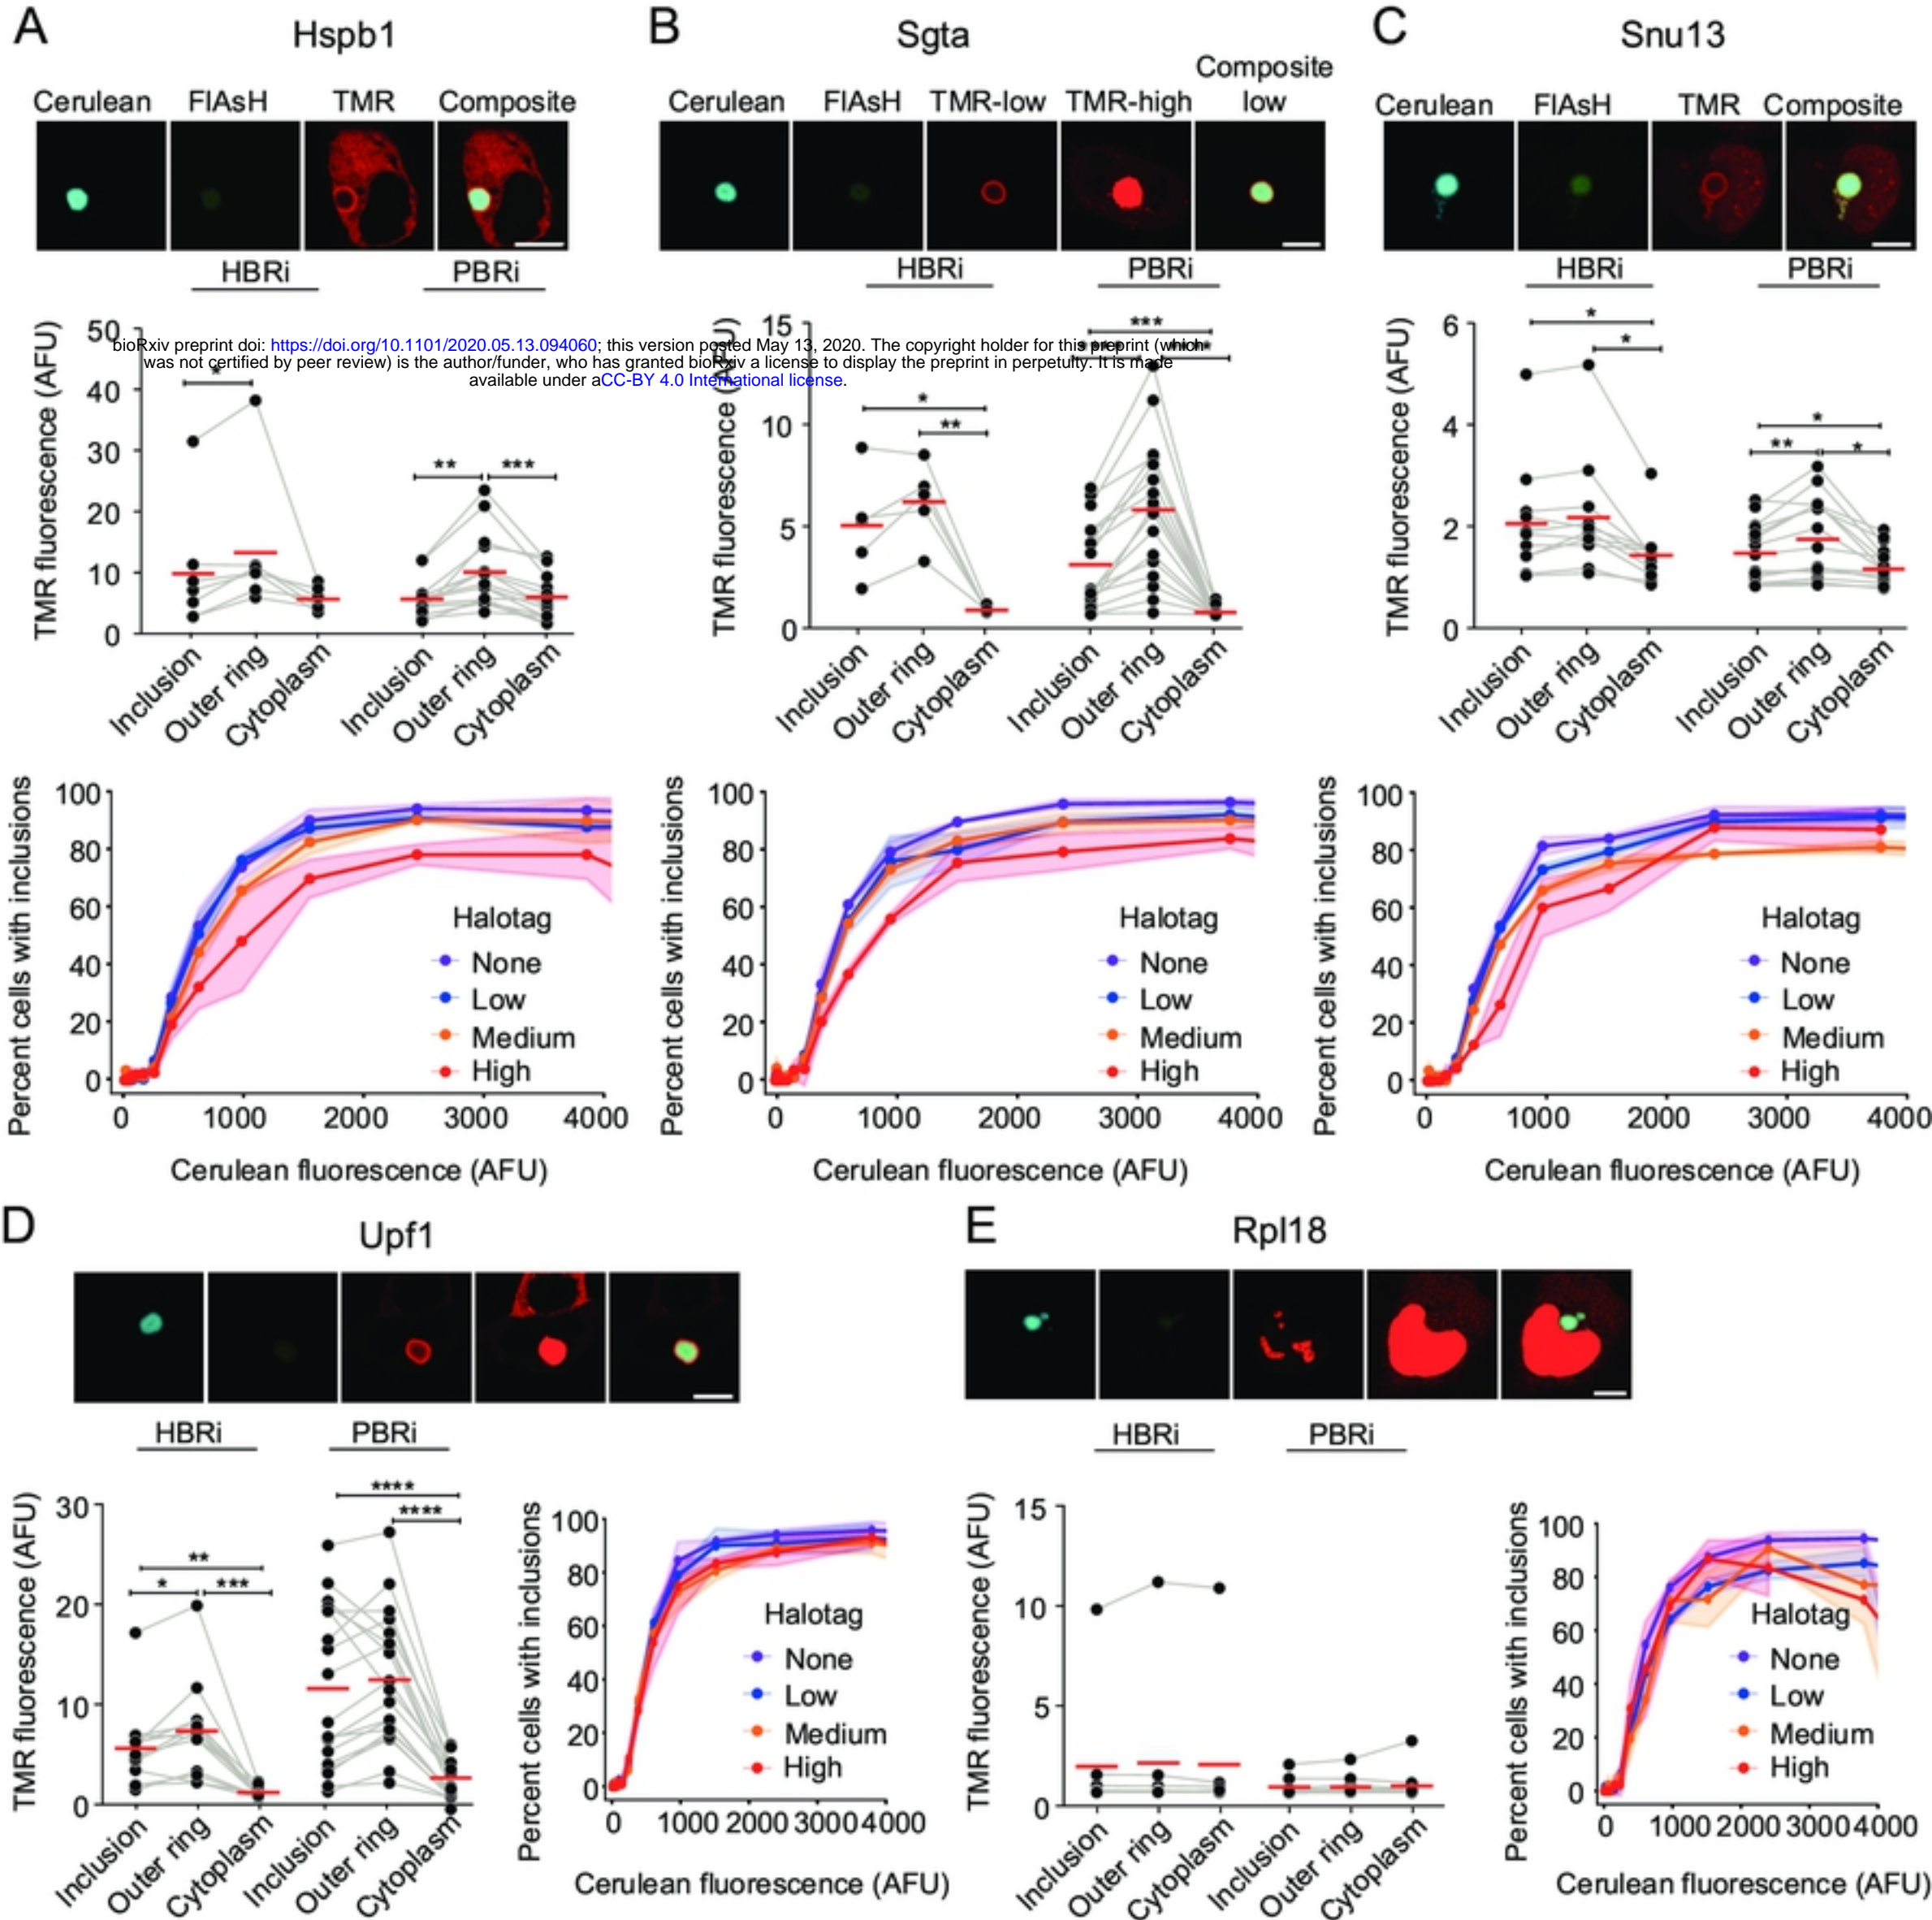

Fig 4

A

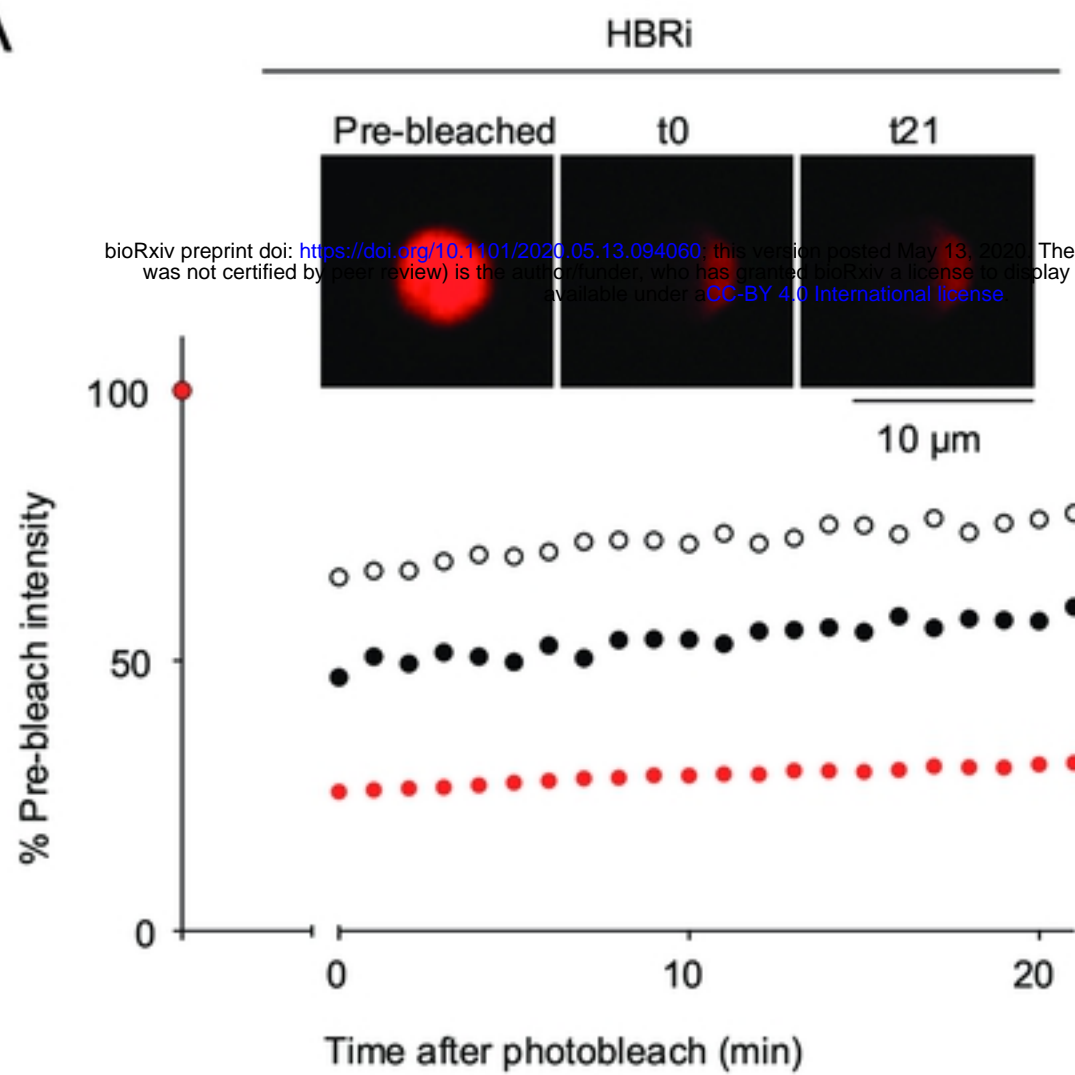

B

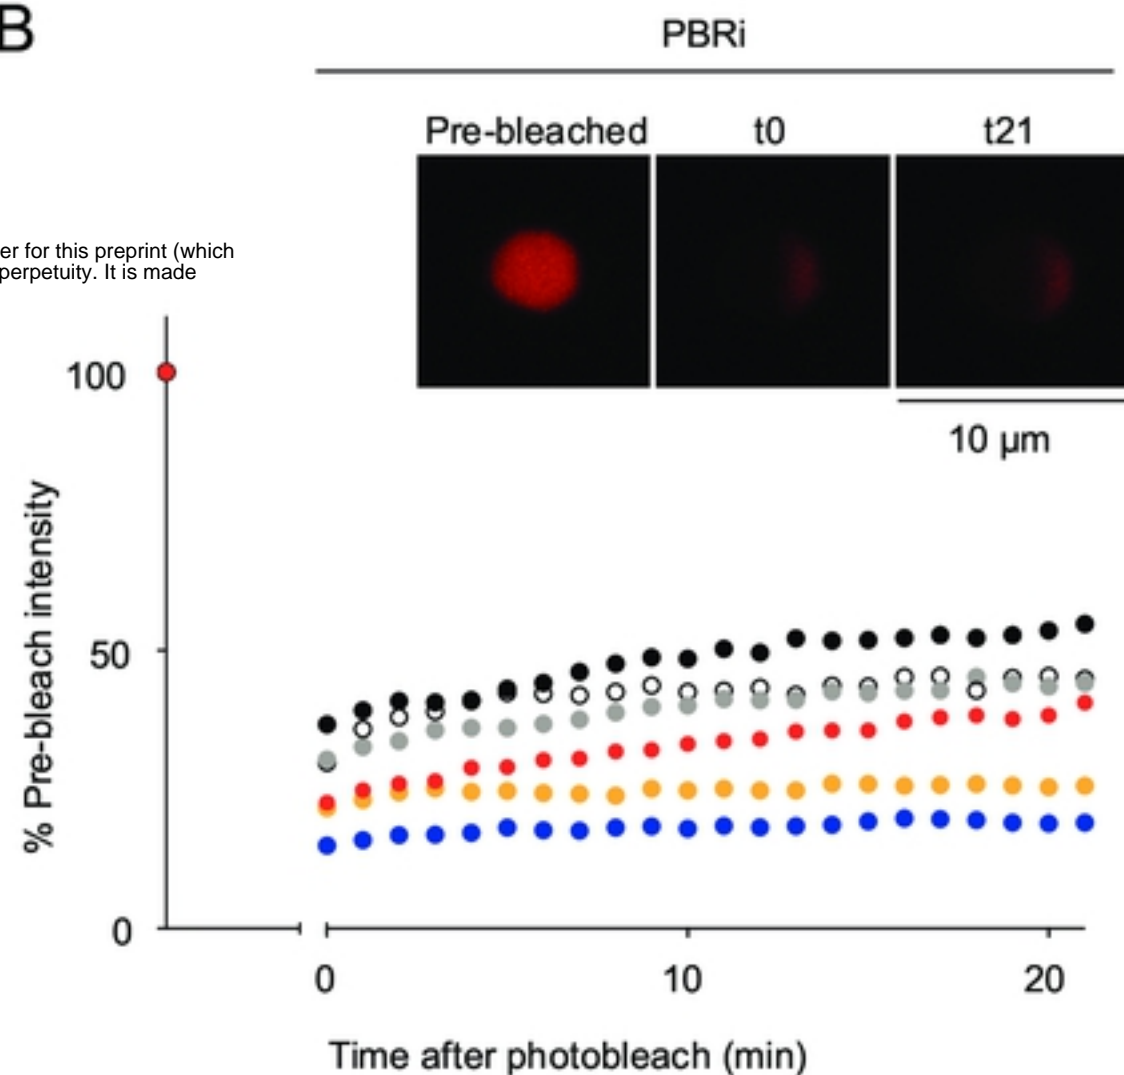

C

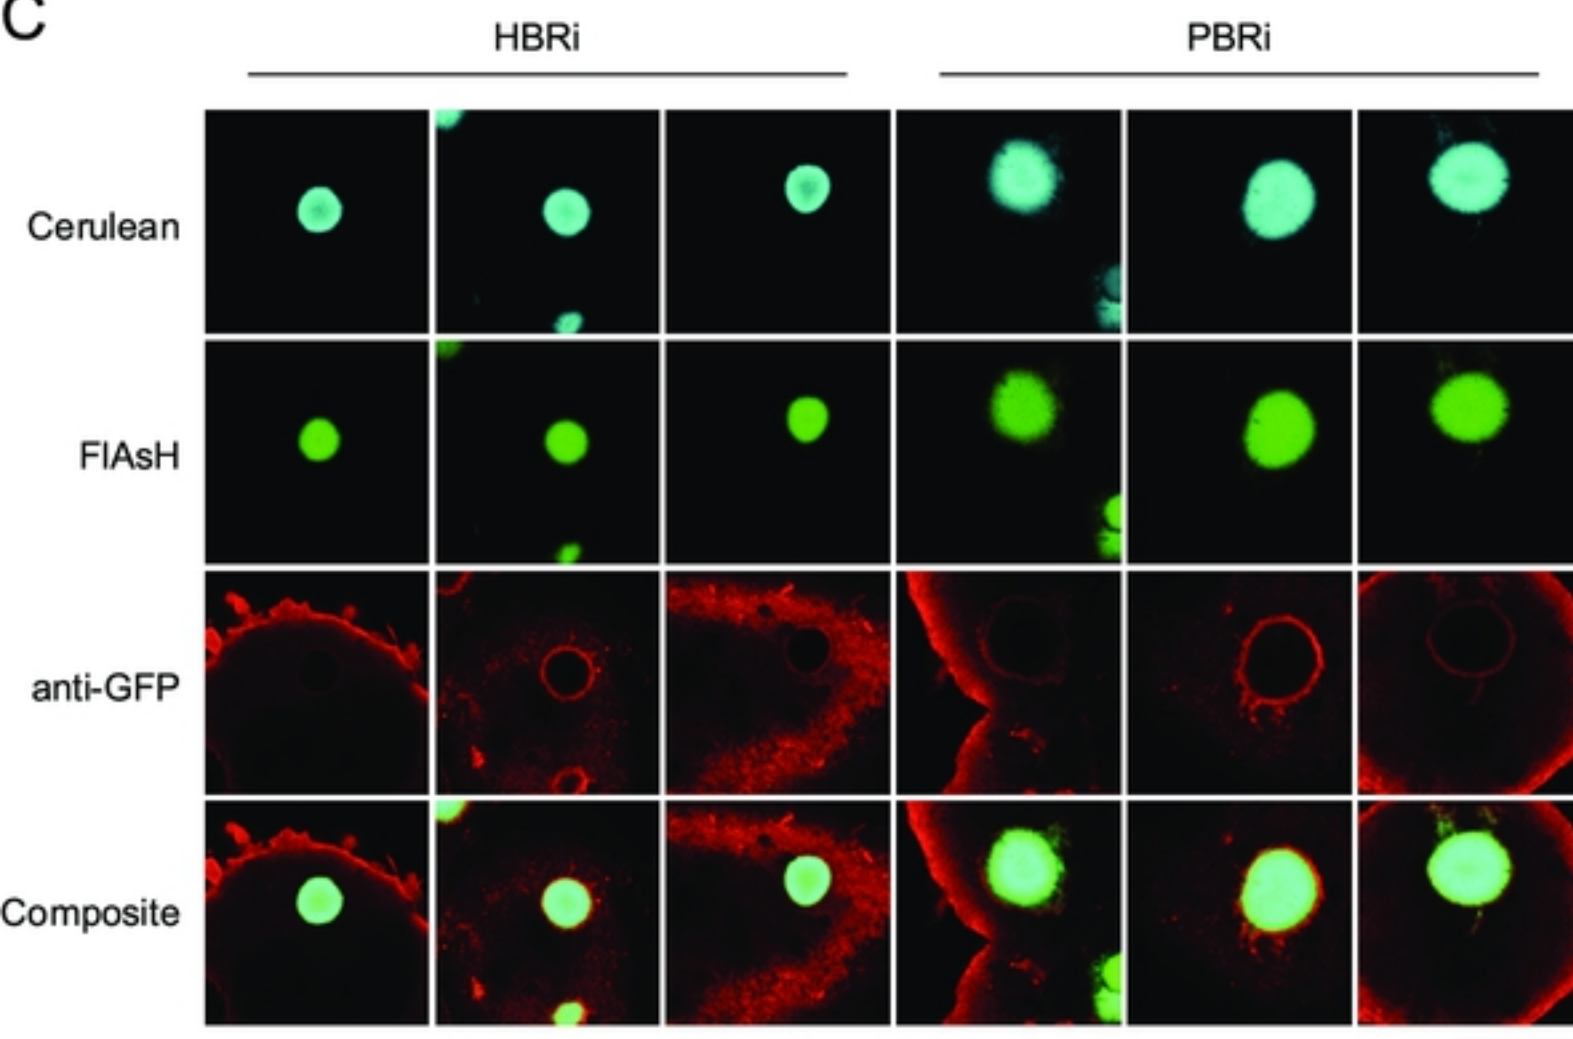

D

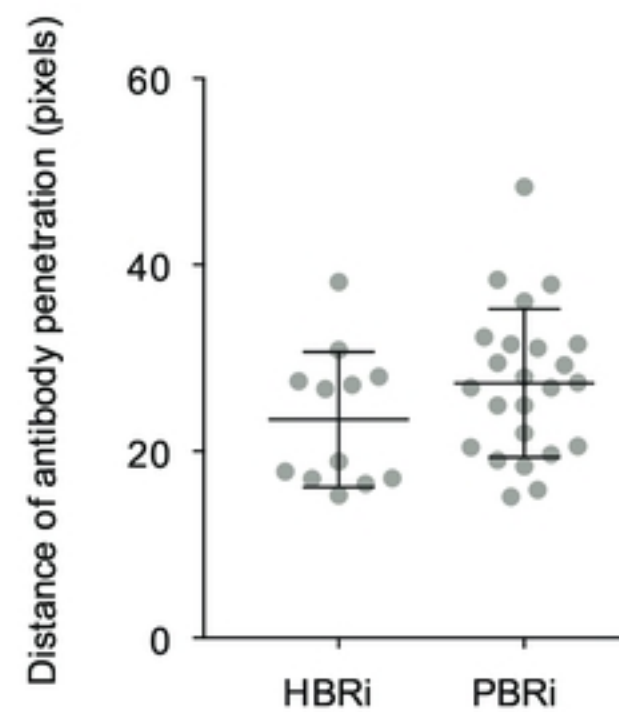

Fig 5
